# Supplementary material
Source: Frontiers journal article supplement (https://www.frontiersin.org/articles/510719)
Supplement: Data_Sheet_1.xls [file Data_Sheet_1.xls]

## Sheet: Table S1
Supplementary Table 1.Detected viruses in PBMCs of SLE patients and Normal controls.
Accession Number	Species	Genetic Material	phylum	order	Family	Genus	Host
NC_001422.1	Enterobacteria phage phiX174	ssDNA viruses	Negarnaviricota	Tymovirales	Microviridae	Phix174microvirus	bacteria
NC_007817.1	Enterobacteria phage ID2	ssRNA viruses	Negarnaviricota	Tymovirales	Leviviridae	Allolevivirus	bacteria
NC_001420.2	Enterobacteria phage G4	ssDNA viruses	Negarnaviricota	Tymovirales	Microviridae	G4microvirus	bacteria
NC_007821.1	Enterobacteria phage WA13	ssDNA viruses	Negarnaviricota	Tymovirales	Microviridae	Alpha3microvirus	bacteria
NC_007856.1	Enterobacteria phage ID18	ssDNA viruses	Negarnaviricota	Tymovirales	Microviridae	G4microvirus	bacteria
NC_012868.1	Enterobacteria phage St-1	ssDNA viruses	Negarnaviricota	Tymovirales	Microviridae	Alpha3microvirus	bacteria
NC_001730.1	Bacteriophage phiK	ssDNA viruses	Negarnaviricota	Tymovirales	Microviridae	Alpha3microvirus	bacteria
NC_001330.1	Enterobacteria phage alpha3	ssDNA viruses	Negarnaviricota	Tymovirales	Microviridae	Alpha3microvirus	bacteria
NC_018464.1	Shamonda virus	ssRNA viruses	Negarnaviricota	Bunyavirales	Peribunyaviridae	Orthobunyavirus	vertebrates| invertebrates| human
NC_003287.2	Enterobacteria phage M13	ssDNA viruses	Negarnaviricota	Tymovirales	Inoviridae	Inovirus	bacteria
NC_001604.1	Enterobacteria phage T7	dsDNA viruses	Negarnaviricota	Caudovirales	Podoviridae	T7virus	bacteria
NC_000866.4	Enterobacteria phage T4	dsDNA viruses	Negarnaviricota	Caudovirales	Myoviridae	T4virus	bacteria
NC_025419.1	Enterobacteria phage RB3	dsDNA viruses	Negarnaviricota	Caudovirales	Myoviridae	T4virus	bacteria
NC_028780.1	Escherichia phage slur07	dsDNA viruses	Negarnaviricota	Caudovirales	Myoviridae	T4virus	bacteria
NC_028448.1	Escherichia phage slur14	dsDNA viruses	Negarnaviricota	Caudovirales	Myoviridae	T4virus	bacteria
NC_027404.1	Yersinia phage PST	dsDNA viruses	Negarnaviricota	Caudovirales	Myoviridae	T4virus	bacteria
NC_019399.1	Enterobacteria phage vB_EcoM_ACG-C40	dsDNA viruses	Negarnaviricota	Caudovirales	Myoviridae	T4virus	bacteria
NC_027353.1	Yersinia phage phiD1	dsDNA viruses	Negarnaviricota	Caudovirales	Myoviridae	T4virus	bacteria
NC_025448.1	Enterobacteria phage RB27	dsDNA viruses	Negarnaviricota	Caudovirales	Myoviridae	T4virus	bacteria
NC_008515.1	Bacteriophage RB32	dsDNA viruses	Negarnaviricota	Caudovirales	Myoviridae	T4virus	bacteria
NC_031047.1	Escherichia phage HY03	dsDNA viruses	Negarnaviricota	Caudovirales	Myoviridae	T4virus	bacteria
NC_028927.1	Escherichia phage slur02	dsDNA viruses	Negarnaviricota	Caudovirales	Myoviridae	T4virus	bacteria
NC_031011.1	Shigella phage SHFML-26	dsDNA viruses	Negarnaviricota	Caudovirales	Myoviridae	T4virus	bacteria
NC_025449.1	Escherichia phage ECML-134	dsDNA viruses	Negarnaviricota	Caudovirales	Myoviridae	T4virus	bacteria
NC_012635.1	Enterobacteria phage RB51	dsDNA viruses	Negarnaviricota	Caudovirales	Myoviridae	T4virus	bacteria
NC_027979.1	Enterobacteria phage RB68	dsDNA viruses	Negarnaviricota	Caudovirales	Myoviridae	T4virus	bacteria
NC_019505.1	Escherichia phage wV7	dsDNA viruses	Negarnaviricota	Caudovirales	Myoviridae	T4virus	bacteria
NC_024125.2	Escherichia phage e11/2	dsDNA viruses	Negarnaviricota	Caudovirales	Myoviridae	T4virus	bacteria
NC_027983.1	Enterobacteria phage AR1	dsDNA viruses	Negarnaviricota	Caudovirales	Myoviridae	T4virus	bacteria
NC_025824.1	Enterobacteria phage fd	ssDNA viruses	Negarnaviricota	Tymovirales	Inoviridae	Inovirus	bacteria
NC_012638.1	Enterobacteria phage RB14	dsDNA viruses	Negarnaviricota	Caudovirales	Myoviridae	T4virus	bacteria
NC_031103.1	Escherichia phage vB_EcoM-UFV13	dsDNA viruses	Negarnaviricota	Caudovirales	Myoviridae	T4virus	bacteria
NC_004777.1	Yersinia pestis phage phiA1122	dsDNA viruses	Negarnaviricota	Caudovirales	Podoviridae	T7virus	bacteria
NC_011045.1	Enterobacteria phage 13a	dsDNA viruses	Negarnaviricota	Caudovirales	Podoviridae	T7virus	bacteria
NC_027387.1	Escherichia phage CICC 80001	dsDNA viruses	Negarnaviricota	Caudovirales	Podoviridae	T7virus	bacteria
NC_030953.1	Shigella phage SHFML-11	dsDNA viruses	Negarnaviricota	Caudovirales	Myoviridae	T4virus	bacteria
NC_031085.1	Shigella phage SHBML-50-1	dsDNA viruses	Negarnaviricota	Caudovirales	Myoviridae	T4virus	bacteria
NC_015457.1	Shigella phage Shfl2	dsDNA viruses	Negarnaviricota	Caudovirales	Myoviridae	T4virus	bacteria
NC_031114.1	Escherichia phage 64795_ec1	dsDNA viruses	Negarnaviricota	Caudovirales	Podoviridae	T7virus	bacteria
NC_019503.1	Enterobacteria phage ime09	dsDNA viruses	Negarnaviricota	Caudovirales	Myoviridae	T4virus	bacteria
NC_031030.1	Escherichia phage UFV-AREG1	dsDNA viruses	Negarnaviricota	Caudovirales	Myoviridae	T4virus	bacteria
NC_025829.1	Shigella phage pSs-1	dsDNA viruses	Negarnaviricota	Caudovirales	Myoviridae	T4virus	bacteria
NC_006273.2	Human herpesvirus 5 strain Merlin	dsDNA viruses	Negarnaviricota	Herpesvirales	Herpesviridae	Cytomegalovirus	vertebrates| human
NC_027349.1	Escherichia phage HY01	dsDNA viruses	Negarnaviricota	Caudovirales	Myoviridae	T4virus	bacteria
NC_014078.1	Torque teno virus 19	ssDNA viruses	Negarnaviricota	Tymovirales	Anelloviridae	Alphatorquevirus	vertebrates| human
NC_001416.1	Enterobacteria phage lambda	dsDNA viruses	Negarnaviricota	Caudovirales	Siphoviridae	Lambdavirus	bacteria
NC_019723.1	Enterobacteria phage HK630	dsDNA viruses	Negarnaviricota	Caudovirales	Siphoviridae	Lambdavirus	bacteria
NC_001331.1	Pseudomonas phage Pf1	ssDNA viruses	Negarnaviricota	Tymovirales	Inoviridae	Inovirus	bacteria
NC_019711.1	Enterobacteria phage HK629	dsDNA viruses	Negarnaviricota	Caudovirales	Siphoviridae	Lambdavirus	bacteria
NC_022749.1	Shigella phage SfIV	dsDNA viruses	Negarnaviricota	Caudovirales	Myoviridae	unclassified bacterial viruses	bacteria
NC_005856.1	Enterobacteria phage P1	dsDNA viruses	Negarnaviricota	Caudovirales	Myoviridae	P1virus	bacteria
NC_014084.1	Torque teno virus 8	ssDNA viruses	Negarnaviricota	Tymovirales	Anelloviridae	Alphatorquevirus	vertebrates| human
NC_001669.1	Simian virus 40	dsDNA viruses	Negarnaviricota	Tymovirales	Polyomaviridae	Betapolyomavirus	vertebrates| human
NC_015783.1	Torque teno virus	ssDNA viruses	Negarnaviricota	Tymovirales	Anelloviridae	Alphatorquevirus	vertebrates| human
NC_004831.2	Enterobacteria phage SP6	dsDNA viruses	Negarnaviricota	Caudovirales	Podoviridae	Sp6virus	bacteria
NC_014096.1	Torque teno virus 15	ssDNA viruses	Negarnaviricota	Tymovirales	Anelloviridae	Alphatorquevirus	vertebrates| human
NC_014076.1	Torque teno virus 10	ssDNA viruses	Negarnaviricota	Tymovirales	Anelloviridae	Alphatorquevirus	vertebrates| human
NC_014094.1	Torque teno virus 6	ssDNA viruses	Negarnaviricota	Tymovirales	Anelloviridae	Alphatorquevirus	vertebrates| human
NC_014080.1	Torque teno virus 7	ssDNA viruses	Negarnaviricota	Tymovirales	Anelloviridae	Alphatorquevirus	vertebrates| human
NC_002076.2	Torque teno virus 1	ssDNA viruses	Negarnaviricota	Tymovirales	Anelloviridae	Alphatorquevirus	vertebrates| human
NC_014073.1	Torque teno virus 28	ssDNA viruses	Negarnaviricota	Tymovirales	Anelloviridae	Alphatorquevirus	vertebrates| human
NC_014081.1	Torque teno virus 3	ssDNA viruses	Negarnaviricota	Tymovirales	Anelloviridae	Alphatorquevirus	vertebrates| human
NC_009333.1	Human herpesvirus 8	dsDNA viruses	Negarnaviricota	Herpesvirales	Herpesviridae	Rhadinovirus	vertebrates| human
NC_014075.1	Torque teno virus 12	ssDNA viruses	Negarnaviricota	Tymovirales	Anelloviridae	Alphatorquevirus	vertebrates| human
NC_011356.1	Enterobacteria phage YYZ-2008	dsDNA viruses	Negarnaviricota	Caudovirales	Siphoviridae	unclassified bacterial viruses	bacteria
NC_011357.1	Stx2-converting phage 1717	dsDNA viruses	Negarnaviricota	Caudovirales	Siphoviridae	unclassified bacterial viruses	bacteria
NC_009334.1	Human herpesvirus 4 type 2	dsDNA viruses	Negarnaviricota	Herpesvirales	Herpesviridae	Lymphocryptovirus	vertebrates| human
NC_007605.1	Human herpesvirus 4	dsDNA viruses	Negarnaviricota	Herpesvirales	Herpesviridae	Lymphocryptovirus	vertebrates| human
NC_019416.1	Stenotrophomonas phage IME15	dsDNA viruses	Negarnaviricota	Caudovirales	Podoviridae	T7virus	bacteria
NC_002014.1	Enterobacteria phage Ike	ssDNA viruses	Negarnaviricota	Tymovirales	Inoviridae	Lineavirus	bacteria
NC_019725.1	Escherichia phage ADB-2	dsDNA viruses	Negarnaviricota	Caudovirales	Siphoviridae	T1virus	bacteria
NC_026010.1	Shigella phage pSf-2	dsDNA viruses	Negarnaviricota	Caudovirales	Siphoviridae	T1virus	bacteria
NC_005833.1	Enterobacteria phage T1	dsDNA viruses	Negarnaviricota	Caudovirales	Siphoviridae	T1virus	bacteria
NC_015456.1	Shigella phage Shfl1	dsDNA viruses	Negarnaviricota	Caudovirales	Siphoviridae	Siphoviridae	bacteria
NC_004813.1	Enterobacteria phage BP-4795	dsDNA viruses	Negarnaviricota	Caudovirales	Siphoviridae	unclassified bacterial viruses	bacteria
NC_027984.1	Escherichia virus 24B	dsDNA viruses	Negarnaviricota	Caudovirales	Podoviridae	Nona33virus	bacteria
NC_014074.1	Torque teno virus 27	ssDNA viruses	Negarnaviricota	Tymovirales	Anelloviridae	Alphatorquevirus	vertebrates| human
NC_008168.1	Choristoneura occidentalis granulovirus	dsDNA viruses	Negarnaviricota	Tymovirales	Baculoviridae	Betabaculovirus	invertebrates
NC_014091.1	Torque teno virus 16	ssDNA viruses	Negarnaviricota	Tymovirales	Anelloviridae	Alphatorquevirus	vertebrates| human
NC_000924.1	Enterobacteria phage 933W	dsDNA viruses	Negarnaviricota	Caudovirales	Podoviridae	Nona33virus	bacteria
NC_020859.1	Synechococcus phage S-RIM2	dsDNA viruses	Negarnaviricota	Caudovirales	Myoviridae	unclassified bacterial viruses	bacteria
NC_021536.1	Synechococcus phage S-IOM18	dsDNA viruses	Negarnaviricota	Caudovirales	Myoviridae	unclassified bacterial viruses	bacteria
NC_031935.1	Synechococcus phage S-WAM2	dsDNA viruses	Negarnaviricota	Caudovirales	Myoviridae	unclassified bacterial viruses	bacteria
NC_015286.1	Synechococcus phage Syn19	dsDNA viruses	Negarnaviricota	Caudovirales	Myoviridae	unclassified bacterial viruses	bacteria
NC_031927.1	Synechococcus phage S-CAM7	dsDNA viruses	Negarnaviricota	Caudovirales	Myoviridae	unclassified bacterial viruses	bacteria
NC_020486.1	Synechococcus phage S-RIM8	dsDNA viruses	Negarnaviricota	Caudovirales	Myoviridae	unclassified bacterial viruses	bacteria
NC_008296.2	Synechococcus phage syn9	dsDNA viruses	Negarnaviricota	Caudovirales	Myoviridae	unclassified bacterial viruses	bacteria
NC_019716.1	Enterobacteria phage mEp460	dsDNA viruses	Negarnaviricota	Caudovirales	Siphoviridae	unclassified bacterial viruses	bacteria
NC_020837.1	Synechococcus phage S-CAM1	dsDNA viruses	Negarnaviricota	Caudovirales	Myoviridae	unclassified bacterial viruses	bacteria
NC_023483.1	Antheraea pernyi iflavirus	ssRNA viruses	Negarnaviricota	Picornavirales	Iflaviridae	Iflavirus	invertebrates
NC_013116.1	Sclerotinia gemycircularvirus 1	ssDNA viruses	Negarnaviricota	Tymovirales	Genomoviridae	Gemycircularvirus	fungi
NC_031271.1	Salmonella phage BP12B	dsDNA viruses	Negarnaviricota	Caudovirales	Podoviridae	Sp6virus	bacteria
NC_027339.1	Enterobacteria phage SfI	dsDNA viruses	Negarnaviricota	Caudovirales	Myoviridae	unclassified bacterial viruses	bacteria
NC_004914.3	Stx2 converting phage II	dsDNA viruses	Negarnaviricota	Caudovirales	Podoviridae	Nona33virus	bacteria
NC_001526.4	Human papillomavirus type 16	dsDNA viruses	Negarnaviricota	Tymovirales	Papillomaviridae	Alphapapillomavirus	vertebrates| human
NC_019710.1	Enterobacteria phage HK140	dsDNA viruses	Negarnaviricota	Caudovirales	Siphoviridae	Hk97virus	bacteria
NC_009514.1	Phage cdtI	dsDNA viruses	Negarnaviricota	Caudovirales	Siphoviridae	unclassified bacterial viruses	bacteria
NC_004913.3	Stx1 converting phage	dsDNA viruses	Negarnaviricota	Caudovirales	Podoviridae	Nona33virus	bacteria
NC_010237.1	Enterobacteria phage Min27	dsDNA viruses	Negarnaviricota	Caudovirales	Podoviridae	Nona33virus	bacteria
NC_000902.1	Enterobacteria phage VT2-Sakai	dsDNA viruses	Negarnaviricota	Caudovirales	Podoviridae	Nona34virus	bacteria
NC_002167.1	Enterobacteria phage HK97	dsDNA viruses	Negarnaviricota	Caudovirales	Siphoviridae	Hk97virus	bacteria
NC_020414.1	Enterobacteria phage UAB_Phi78	dsDNA viruses	Negarnaviricota	Caudovirales	Podoviridae	Sp6virus	bacteria
NC_019768.1	Enterobacteria phage HK106	dsDNA viruses	Negarnaviricota	Caudovirales	Siphoviridae	Hk97virus	bacteria
NC_008464.1	Stx2-converting phage 86	dsDNA viruses	Negarnaviricota	Caudovirales	Podoviridae	Nona33virus	bacteria
NC_019708.1	Enterobacteria phage mEp235	dsDNA viruses	Negarnaviricota	Caudovirales	Siphoviridae	Hk97virus	bacteria
NC_019488.1	Salmonella phage RE-2010	dsDNA viruses	Negarnaviricota	Caudovirales	Myoviridae	P2virus	bacteria
NC_014077.1	Torque teno virus 14	ssDNA viruses	Negarnaviricota	Tymovirales	Anelloviridae	Alphatorquevirus	vertebrates| human
NC_002166.1	Bacteriophage HK022	dsDNA viruses	Negarnaviricota	Caudovirales	Siphoviridae	Hk97virus	bacteria
NC_003521.1	Panine herpesvirus 2	dsDNA viruses	Negarnaviricota	Herpesvirales	Herpesviridae	Cytomegalovirus	vertebrates
NC_030230.1	Tokyovirus A1	dsDNA viruses	Negarnaviricota	Tymovirales	Marseilleviridae	unclassified viruses	protozoa
NC_019709.1	Enterobacteria phage mEpX1	dsDNA viruses	Negarnaviricota	Caudovirales	Siphoviridae	Hk97virus	bacteria
NC_019705.1	Enterobacteria phage mEpX2	dsDNA viruses	Negarnaviricota	Caudovirales	Siphoviridae	Hk97virus	bacteria
NC_006150.1	Macacine herpesvirus 3	dsDNA viruses	Negarnaviricota	Herpesvirales	Herpesviridae	Cytomegalovirus	vertebrates
NC_033176.1	Cynomolgus cytomegalovirus	dsDNA viruses	Negarnaviricota	Herpesvirales	Herpesviridae	Cytomegalovirus	vertebrates
NC_012783.2	Cercopithecine herpesvirus 5	dsDNA viruses	Negarnaviricota	Herpesvirales	Herpesviridae	Cytomegalovirus	vertebrates
NC_006146.1	Macacine herpesvirus 4	dsDNA viruses	Negarnaviricota	Herpesvirales	Herpesviridae	Lymphocryptovirus	vertebrates
NC_019719.1	Enterobacteria phage HK633	dsDNA viruses	Negarnaviricota	Caudovirales	Siphoviridae	Hk97virus	bacteria
NC_005344.1	Enterobacteria phage Sf6	dsDNA viruses	Negarnaviricota	Caudovirales	Podoviridae	P22virus	bacteria
NC_019714.1	Enterobacteria phage HK446	dsDNA viruses	Negarnaviricota	Caudovirales	Siphoviridae	Hk97virus	bacteria
NC_002730.1	Enterobacteria phage HK620	dsDNA viruses	Negarnaviricota	Caudovirales	Podoviridae	P22virus	bacteria
NC_021857.1	Shigella phage SfII	dsDNA viruses	Negarnaviricota	Caudovirales	Myoviridae	unclassified bacterial viruses	bacteria
NC_019767.1	Enterobacteria phage HK544	dsDNA viruses	Negarnaviricota	Caudovirales	Siphoviridae	Hk97virus	bacteria
NC_019501.1	Enterobacteria phage IME10	dsDNA viruses	Negarnaviricota	Caudovirales	Podoviridae	P22virus	bacteria
NC_028696.2	Salmonella phage SEN22	dsDNA viruses	Negarnaviricota	Caudovirales	Podoviridae	P22virus	bacteria
NC_027398.1	Enterobacteria phage Sf101	dsDNA viruses	Negarnaviricota	Caudovirales	Podoviridae	P22virus	bacteria
NC_019769.1	Enterobacteria phage HK542	dsDNA viruses	Negarnaviricota	Caudovirales	Siphoviridae	Hk97virus	bacteria
NC_001407.1	Rous sarcoma virus	Not classified	Negarnaviricota	Ortervirales	Retroviridae	Alpharetrovirus	vertebrates
NC_019715.1	Enterobacterial phage mEp234	dsDNA viruses	Negarnaviricota	Caudovirales	Siphoviridae	Hk97virus	bacteria
NC_019720.1	Enterobacterial phage mEp213	dsDNA viruses	Negarnaviricota	Caudovirales	Siphoviridae	unclassified bacterial viruses	bacteria
NC_029120.1	Shigella phage 75/02 Stx	dsDNA viruses	Negarnaviricota	Caudovirales	Podoviridae	Pocjvirus	bacteria
NC_014480.2	Torque teno virus 2	ssDNA viruses	Negarnaviricota	Tymovirales	Anelloviridae	Alphatorquevirus	vertebrates| human
NC_025434.1	Shigella phage POCJ13	dsDNA viruses	Negarnaviricota	Caudovirales	Podoviridae	Pocjvirus	bacteria
NC_028847.1	Enterobacteria phage QL01	dsDNA viruses	Negarnaviricota	Caudovirales	Myoviridae	Js98virus	bacteria
NC_027333.1	Propionibacterium phage PHL070N00	dsDNA viruses	Negarnaviricota	Caudovirales	Siphoviridae	Pa6virus	bacteria
NC_027373.1	Propionibacterium phage PHL030N00	dsDNA viruses	Negarnaviricota	Caudovirales	Siphoviridae	Pa6virus	bacteria
NC_027386.1	Propionibacterium phage PHL152M00	dsDNA viruses	Negarnaviricota	Caudovirales	Siphoviridae	Pa6virus	bacteria
NC_010105.1	Enterobacteria phage JS98	dsDNA viruses	Negarnaviricota	Caudovirales	Myoviridae	Js98virus	bacteria
NC_031019.1	Enterobacteria phage UAB_Phi20	dsDNA viruses	Negarnaviricota	Caudovirales	Podoviridae	P22virus	bacteria
NC_031928.1	Escherichia phage WG01	dsDNA viruses	Negarnaviricota	Caudovirales	Myoviridae	Js98virus	bacteria
NC_019706.1	Enterobacteria phage mEp043 c-1	dsDNA viruses	Negarnaviricota	Caudovirales	Siphoviridae	unclassified bacterial viruses	bacteria
NC_011976.1	Salmonella phage epsilon34	dsDNA viruses	Negarnaviricota	Caudovirales	Podoviridae	P22virus	bacteria
NC_027401.1	Propionibacterium phage PHL095N00	dsDNA viruses	Negarnaviricota	Caudovirales	Siphoviridae	Pa6virus	bacteria
NC_012741.1	Enterobacteria phage JS10	dsDNA viruses	Negarnaviricota	Caudovirales	Myoviridae	Js98virus	bacteria
NC_019500.1	Enterobacteria phage Bp7	dsDNA viruses	Negarnaviricota	Caudovirales	Myoviridae	Js98virus	bacteria
NC_027630.1	Propionibacterium phage Ouroboros	dsDNA viruses	Negarnaviricota	Caudovirales	Siphoviridae	Pa6virus	bacteria
NC_010463.1	Enterobacteria phage Fels-2	dsDNA viruses	Negarnaviricota	Caudovirales	Myoviridae	P2virus	bacteria
NC_015271.1	Salmonella phage Vi06	dsDNA viruses	Negarnaviricota	Caudovirales	Podoviridae	T7virus	bacteria
NC_028683.1	Edwardsiella phage PEi20	dsDNA viruses	Negarnaviricota	Caudovirales	Myoviridae	unclassified bacterial viruses	bacteria
NC_018839.1	Propionibacterium phage P14.4	dsDNA viruses	Negarnaviricota	Caudovirales	Siphoviridae	Pa6virus	bacteria
NC_002371.2	Enterobacteria phage P22	dsDNA viruses	Negarnaviricota	Caudovirales	Podoviridae	P22virus	bacteria
NC_014260.1	Enterobacteria phage IME08	dsDNA viruses	Negarnaviricota	Caudovirales	Myoviridae	Js98virus	bacteria
NC_018838.1	Propionibacterium phage P100_A	dsDNA viruses	Negarnaviricota	Caudovirales	Siphoviridae	Pa6virus	bacteria
NC_027354.1	Propionibacterium phage PHL301M00	dsDNA viruses	Negarnaviricota	Caudovirales	Siphoviridae	Pa6virus	bacteria
NC_027623.1	Propionibacterium phage Pirate	dsDNA viruses	Negarnaviricota	Caudovirales	Siphoviridae	Pa6virus	bacteria
NC_016160.1	Escherichia phage HK75	dsDNA viruses	Negarnaviricota	Caudovirales	Siphoviridae	Hk97virus	bacteria
NC_029853.1	Mus musculus mobilized endogenous polytropic provirus	Not classified	Negarnaviricota	Ortervirales	Retroviridae	Gammaretrovirus	vertebrates
NC_027362.1	Propionibacterium phage PHL116M00	dsDNA viruses	Negarnaviricota	Caudovirales	Siphoviridae	Pa6virus	bacteria
NC_022340.1	Propionibacterium phage PHL114L00	dsDNA viruses	Negarnaviricota	Caudovirales	Siphoviridae	Pa6virus	bacteria
NC_027295.1	Propionibacterium phage PHL199M00	dsDNA viruses	Negarnaviricota	Caudovirales	Siphoviridae	Pa6virus	bacteria
NC_001623.1	Autographa californica nucleopolyhedrovirus	dsDNA viruses	Negarnaviricota	Tymovirales	Baculoviridae	Alphabaculovirus	invertebrates
NC_015454.1	Propionibacterium phage PAD20	dsDNA viruses	Negarnaviricota	Caudovirales	Siphoviridae	Pa6virus	bacteria
NC_031005.1	Propionibacterium phage QueenBey	dsDNA viruses	Negarnaviricota	Caudovirales	Siphoviridae	Pa6virus	bacteria
NC_027625.1	Propionibacterium phage Kubed	dsDNA viruses	Negarnaviricota	Caudovirales	Siphoviridae	Pa6virus	bacteria
NC_027385.1	Propionibacterium phage PHL092M00	dsDNA viruses	Negarnaviricota	Caudovirales	Siphoviridae	Pa6virus	bacteria
NC_018845.1	Propionibacterium phage P104A	dsDNA viruses	Negarnaviricota	Caudovirales	Siphoviridae	Pa6virus	bacteria
NC_014069.1	Torque teno virus 4	ssDNA viruses	Negarnaviricota	Tymovirales	Anelloviridae	Alphatorquevirus	vertebrates| human
NC_001702.1	Murine type C retrovirus	Not classified	Negarnaviricota	Ortervirales	Retroviridae	Gammaretrovirus	vertebrates
NC_022337.1	Propionibacterium phage PHL071N05	dsDNA viruses	Negarnaviricota	Caudovirales	Siphoviridae	Pa6virus	bacteria
NC_018275.1	Salmonella phage vB_SemP_Emek	dsDNA viruses	Negarnaviricota	Caudovirales	Podoviridae	P22virus	bacteria
NC_031084.1	Propionibacterium phage BruceLethal	dsDNA viruses	Negarnaviricota	Caudovirales	Siphoviridae	Pa6virus	bacteria
NC_028656.1	Enterobacteria phage VT2phi_272	dsDNA viruses	Negarnaviricota	Caudovirales	Podoviridae	Sepvirinae	bacteria
NC_027627.1	Propionibacterium phage Solid	dsDNA viruses	Negarnaviricota	Caudovirales	Siphoviridae	Pa6virus	bacteria
NC_027629.1	Propionibacterium phage Attacne	dsDNA viruses	Negarnaviricota	Caudovirales	Siphoviridae	Pa6virus	bacteria
NC_027346.1	Propionibacterium phage PHL171M01	dsDNA viruses	Negarnaviricota	Caudovirales	Siphoviridae	Pa6virus	bacteria
NC_031119.1	Propionibacterium phage Enoki	dsDNA viruses	Negarnaviricota	Caudovirales	Siphoviridae	Pa6virus	bacteria
NC_027622.1	Propionibacterium phage Stormborn	dsDNA viruses	Negarnaviricota	Caudovirales	Siphoviridae	Pa6virus	bacteria
NC_013059.1	Salmonella phage c341	dsDNA viruses	Negarnaviricota	Caudovirales	Podoviridae	P22virus	bacteria
NC_018842.1	Propionibacterium phage P1.1	dsDNA viruses	Negarnaviricota	Caudovirales	Siphoviridae	Pa6virus	bacteria
NC_031934.1	Escherichia phage MX01	dsDNA viruses	Negarnaviricota	Caudovirales	Myoviridae	Js98virus	bacteria
NC_028881.1	Enterobacteria phage vB_EcoM_VR5	dsDNA viruses	Negarnaviricota	Caudovirales	Myoviridae	Js98virus	bacteria
NC_018852.1	Propionibacterium phage P100D	dsDNA viruses	Negarnaviricota	Caudovirales	Siphoviridae	Pa6virus	bacteria
NC_027361.1	Propionibacterium phage PHL085N00	dsDNA viruses	Negarnaviricota	Caudovirales	Siphoviridae	Pa6virus	bacteria
NC_027294.1	Propionibacterium phage PHL150M00	dsDNA viruses	Negarnaviricota	Caudovirales	Siphoviridae	Pa6virus	bacteria
NC_027370.1	Propionibacterium phage PHL179M00	dsDNA viruses	Negarnaviricota	Caudovirales	Siphoviridae	Pa6virus	bacteria
NC_027621.1	Propionibacterium phage Wizzo	dsDNA viruses	Negarnaviricota	Caudovirales	Siphoviridae	Pa6virus	bacteria
NC_007815.2	PreXMRV-1 provirus	Not classified	Negarnaviricota	Ortervirales	Retroviridae	Gammaretrovirus	vertebrates
NC_024124.2	Escherichia phage vB_EcoM_JS09	dsDNA viruses	Negarnaviricota	Caudovirales	Myoviridae	Rb69virus	bacteria
NC_022334.1	Propionibacterium phage PHL112N00	dsDNA viruses	Negarnaviricota	Caudovirales	Siphoviridae	Pa6virus	bacteria
NC_026607.2	Salmonella phage STP4-a	dsDNA viruses	Negarnaviricota	Caudovirales	Myoviridae	S16virus	bacteria
NC_027391.1	Propionibacterium phage PHL041M10	dsDNA viruses	Negarnaviricota	Caudovirales	Siphoviridae	Pa6virus	bacteria
NC_006949.1	Enterobacteria phage ES18	dsDNA viruses	Negarnaviricota	Caudovirales	Siphoviridae	unclassified bacterial viruses	bacteria
NC_020416.1	Salmonella phage S16	dsDNA viruses	Negarnaviricota	Caudovirales	Myoviridae	S16virus	bacteria
NC_019704.1	Enterobacteria phage mEp237	dsDNA viruses	Negarnaviricota	Caudovirales	Siphoviridae	unclassified bacterial viruses	bacteria
NC_019445.1	Escherichia phage TL-2011b	dsDNA viruses	Negarnaviricota	Caudovirales	Podoviridae	Epsilon15virus	bacteria
NC_022342.1	Propionibacterium phage PHL111M01	dsDNA viruses	Negarnaviricota	Caudovirales	Siphoviridae	Pa6virus	bacteria
NC_018849.1	Propionibacterium phage P105	dsDNA viruses	Negarnaviricota	Caudovirales	Siphoviridae	Pa6virus	bacteria
NC_004928.1	Enterobacteria phage RB69	dsDNA viruses	Negarnaviricota	Caudovirales	Myoviridae	Rb69virus	bacteria
NC_027628.1	Propionibacterium phage Lauchelly	dsDNA viruses	Negarnaviricota	Caudovirales	Siphoviridae	Pa6virus	bacteria
NC_028686.1	Klebsiella phage JD18	dsDNA viruses	Negarnaviricota	Caudovirales	Myoviridae	Jd18virus	bacteria
NC_027371.1	Propionibacterium virus Pacnes201215	dsDNA viruses	Negarnaviricota	Caudovirales	Siphoviridae	Pa6virus	bacteria
NC_027400.1	Propionibacterium phage PHL055N00	dsDNA viruses	Negarnaviricota	Caudovirales	Siphoviridae	Pa6virus	bacteria
NC_029091.1	Escherichia phage APCEc01	dsDNA viruses	Negarnaviricota	Caudovirales	Myoviridae	Rb69virus	bacteria
NC_021190.1	Enterobacteria phage phi80	dsDNA viruses	Negarnaviricota	Caudovirales	Siphoviridae	unclassified bacterial viruses	bacteria
NC_031003.1	Propionibacterium phage Moyashi	dsDNA viruses	Negarnaviricota	Caudovirales	Siphoviridae	Pa6virus	bacteria
NC_017985.1	Salmonella phage SPN9CC	dsDNA viruses	Negarnaviricota	Caudovirales	Podoviridae	P22virus	bacteria
NC_022335.1	Propionibacterium phage PHL067M10	dsDNA viruses	Negarnaviricota	Caudovirales	Siphoviridae	Pa6virus	bacteria
NC_028940.1	Pectobacterium bacteriophage PM2	dsDNA viruses	Negarnaviricota	Caudovirales	Myoviridae	unclassified bacterial viruses	bacteria
NC_027357.1	Propionibacterium phage PHL025M00	dsDNA viruses	Negarnaviricota	Caudovirales	Siphoviridae	Pa6virus	bacteria
NC_013085.1	Synechococcus phage S-RSM4	dsDNA viruses	Negarnaviricota	Caudovirales	Myoviridae	unclassified bacterial viruses	bacteria
NC_015453.1	Propionibacterium phage PAS50	dsDNA viruses	Negarnaviricota	Caudovirales	Siphoviridae	Pa6virus	bacteria
NC_018834.1	Propionibacterium phage P9.1	dsDNA viruses	Negarnaviricota	Caudovirales	Siphoviridae	Pa6virus	bacteria
NC_027624.1	Propionibacterium phage SKKY	dsDNA viruses	Negarnaviricota	Caudovirales	Siphoviridae	Pa6virus	bacteria
NC_031090.1	Shigella phage SHSML-52-1	dsDNA viruses	Negarnaviricota	Caudovirales	Myoviridae	Rb69virus	bacteria
NC_022336.1	Propionibacterium phage PHL010M04	dsDNA viruses	Negarnaviricota	Caudovirales	Siphoviridae	Pa6virus	bacteria
NC_027359.1	Propionibacterium phage PHL082M00	dsDNA viruses	Negarnaviricota	Caudovirales	Siphoviridae	Pa6virus	bacteria
NC_011802.1	Salmonella enterica bacteriophage SE1	dsDNA viruses	Negarnaviricota	Caudovirales	Podoviridae	P22virus	bacteria
NC_031108.1	Propionibacterium phage PFR2	dsDNA viruses	Negarnaviricota	Caudovirales	Siphoviridae	Pfr1virus	bacteria
NC_028967.1	Propionibacterium phage PAC1	dsDNA viruses	Negarnaviricota	Caudovirales	Siphoviridae	Pa6virus	bacteria
NC_018841.1	Propionibacterium phage P101A	dsDNA viruses	Negarnaviricota	Caudovirales	Siphoviridae	Pa6virus	bacteria
NC_026663.1	Simian torque teno virus 30	ssDNA viruses	Negarnaviricota	Tymovirales	Anelloviridae	Alphatorquevirus	vertebrates| human
NC_028449.1	Escherichia phage PA2	dsDNA viruses	Negarnaviricota	Caudovirales	Podoviridae	Tl2011virus	bacteria
NC_028694.1	Propionibacterium phage PA1-14	dsDNA viruses	Negarnaviricota	Caudovirales	Siphoviridae	Pa6virus	bacteria
NC_009541.1	Propionibacterium phage PA6	dsDNA viruses	Negarnaviricota	Caudovirales	Siphoviridae	Pa6virus	bacteria
NC_005841.1	Enterobacteria phage ST104	dsDNA viruses	Negarnaviricota	Caudovirales	Podoviridae	P22virus	bacteria
NC_031095.1	Klebsiella phage PKO111	dsDNA viruses	Negarnaviricota	Caudovirales	Myoviridae	Jd18virus	bacteria
NC_019717.1	Enterobacteria phage HK225	dsDNA viruses	Negarnaviricota	Caudovirales	Siphoviridae	unclassified bacterial viruses	bacteria
NC_001500.1	Spleen focus-forming virus	Not classified	Negarnaviricota	Ortervirales	Retroviridae	Gammaretrovirus	vertebrates
NC_027331.1	Citrobacter phage Moon	dsDNA viruses	Negarnaviricota	Caudovirales	Myoviridae	Moonvirus	bacteria
NC_030919.1	Salmonella phage 118970_sal4	dsDNA viruses	Negarnaviricota	Caudovirales	Podoviridae	P22virus	bacteria
NC_018279.1	Salmonella phage vB_SosS_Oslo	dsDNA viruses	Negarnaviricota	Caudovirales	Siphoviridae	unclassified bacterial viruses	bacteria
NC_024355.1	Staphylococcus phage 6ec	dsDNA viruses	Negarnaviricota	Caudovirales	Siphoviridae	Sextaecvirus	bacteria
NC_018855.1	Enterobacteria phage HX01	dsDNA viruses	Negarnaviricota	Caudovirales	Myoviridae	Rb69virus	bacteria
NC_018851.1	Propionibacterium phage ATCC29399B_C	dsDNA viruses	Negarnaviricota	Caudovirales	Siphoviridae	Pa6virus	bacteria
NC_031129.1	Salmonella phage SJ46	dsDNA viruses	Negarnaviricota	Caudovirales	Myoviridae	P1virus	bacteria
NC_028943.1	Escherichia phage pro483	dsDNA viruses	Negarnaviricota	Caudovirales	Myoviridae	P2virus	bacteria
NC_027620.1	Propionibacterium phage MrAK	dsDNA viruses	Negarnaviricota	Caudovirales	Siphoviridae	Pa6virus	bacteria
NC_027336.1	Propionibacterium phage PHL009M11	dsDNA viruses	Negarnaviricota	Caudovirales	Siphoviridae	Pa6virus	bacteria
NC_027367.1	Propionibacterium phage PHL132N00	dsDNA viruses	Negarnaviricota	Caudovirales	Siphoviridae	Pa6virus	bacteria
NC_014595.1	Shigella phage SP18	dsDNA viruses	Negarnaviricota	Caudovirales	Myoviridae	Sp18virus	bacteria
NC_022341.1	Propionibacterium phage PHL113M01	dsDNA viruses	Negarnaviricota	Caudovirales	Siphoviridae	Pa6virus	bacteria
NC_028857.1	Citrobacter phage Merlin	dsDNA viruses	Negarnaviricota	Caudovirales	Myoviridae	Moonvirus	bacteria
NC_028688.1	Klebsiella phage vB_Kp1	dsDNA viruses	Negarnaviricota	Caudovirales	Podoviridae	Kp32virus	bacteria
NC_019909.1	Yersinia phage phiR1-RT	dsDNA viruses	Negarnaviricota	Caudovirales	Myoviridae	Tg1virus	bacteria
NC_019934.1	Cronobacter phage ENT39118	dsDNA viruses	Negarnaviricota	Caudovirales	Siphoviridae	Hk97virus	bacteria
NC_018840.1	Propionibacterium phage P100_1	dsDNA viruses	Negarnaviricota	Caudovirales	Siphoviridae	Pa6virus	bacteria
NC_028894.1	Enterobacteria phage vB_EcoM_VR20	dsDNA viruses	Negarnaviricota	Caudovirales	Myoviridae	Sp18virus	bacteria
NC_023582.1	Staphylococcus phage vB_SepS_SEP9	dsDNA viruses	Negarnaviricota	Caudovirales	Siphoviridae	Sextaecvirus	bacteria
NC_027344.1	Salmonella phage STML-198	dsDNA viruses	Negarnaviricota	Caudovirales	Myoviridae	S16virus	bacteria
NC_003444.1	Enterobacteria phage SfV	dsDNA viruses	Negarnaviricota	Caudovirales	Myoviridae	unclassified bacterial viruses	bacteria
NC_001506.1	Murine osteosarcoma virus	Not classified	Negarnaviricota	Ortervirales	Retroviridae	Gammaretrovirus	vertebrates
NC_018847.1	Propionibacterium phage ATCC29399B_T	dsDNA viruses	Negarnaviricota	Caudovirales	Siphoviridae	Pa6virus	bacteria
NC_028820.1	Yersinia phage vB_YenM_TG1	dsDNA viruses	Negarnaviricota	Caudovirales	Myoviridae	Tg1virus	bacteria
NC_024794.1	Escherichia phage vB_EcoM_PhAPEC2	dsDNA viruses	Negarnaviricota	Caudovirales	Myoviridae	Rb69virus	bacteria
NC_022338.1	Propionibacterium phage PHL060L00	dsDNA viruses	Negarnaviricota	Caudovirales	Siphoviridae	Rb69virus	bacteria
NC_025437.1	Shigella phage Shf125875	dsDNA viruses	Negarnaviricota	Caudovirales	Myoviridae	Rb69virus	bacteria
NC_026664.1	Simian torque teno virus 32	ssDNA viruses	Negarnaviricota	Tymovirales	Anelloviridae	Alphatorquevirus	vertebrates| human
NC_026765.1	Simian torque teno virus 34	ssDNA viruses	Negarnaviricota	Tymovirales	Anelloviridae	Alphatorquevirus	vertebrates| human
NC_028957.1	Enterobacteria phage vB_EcoM_VR26	dsDNA viruses	Negarnaviricota	Caudovirales	Myoviridae	Sp18virus	bacteria
NC_022096.1	Pseudomonas phage PaBG	dsDNA viruses	Negarnaviricota	Caudovirales	Myoviridae	unclassified bacterial viruses	bacteria
NC_027389.1	Propionibacterium phage PHL141N00	dsDNA viruses	Negarnaviricota	Caudovirales	Siphoviridae	Pa6virus	bacteria
NC_028962.1	Staphylococcus phage phiIPLA-C1C	dsDNA viruses	Negarnaviricota	Caudovirales	Myoviridae	Sep1virus	bacteria
NC_026662.1	Simian torque teno virus 31	ssDNA viruses	Negarnaviricota	Tymovirales	Anelloviridae	Alphatorquevirus	vertebrates| human
NC_028999.1	Pseudomonas phage PhiPA3	dsDNA viruses	Negarnaviricota	Caudovirales	Myoviridae	Phikzvirus	bacteria
NC_004348.1	Enterobacteria phage ST64T	dsDNA viruses	Negarnaviricota	Caudovirales	Podoviridae	P22virus	bacteria
NC_014792.1	Enterobacteria phage vB_EcoM-VR7	dsDNA viruses	Negarnaviricota	Caudovirales	Myoviridae	Sp18virus	bacteria
NC_013647.1	Klebsiella phage KP32	dsDNA viruses	Negarnaviricota	Caudovirales	Podoviridae	Kp32virus	bacteria
NC_028925.1	Enterobacteria phage vB_EcoM_VR25	dsDNA viruses	Negarnaviricota	Caudovirales	Myoviridae	Sp18virus	bacteria
NC_014079.1	Torque teno virus 26	ssDNA viruses	Negarnaviricota	Tymovirales	Anelloviridae	Alphatorquevirus	vertebrates| human
NC_014900.1	Salmonella phage ST160	dsDNA viruses	Negarnaviricota	Caudovirales	Podoviridae	P22virus	bacteria
NC_027626.1	Propionibacterium phage Procrass1	dsDNA viruses	Negarnaviricota	Caudovirales	Siphoviridae	Pa6virus	bacteria
NC_010391.1	Salmonella phage Fels-1	Not classified	unclassified bacterial viruses	unclassified bacterial viruses	unclassified bacterial viruses	unclassified bacterial viruses	bacteria
NC_019929.1	Erwinia phage phiEaH2	dsDNA viruses	Negarnaviricota	Caudovirales	Myoviridae	Spn3virus	bacteria
NC_015279.1	Synechococcus phage S-SM2	dsDNA viruses	Negarnaviricota	Caudovirales	Myoviridae	unclassified bacterial viruses	bacteria
AC_000008.1	Human adenovirus 5	dsDNA viruses	Negarnaviricota	Tymovirales	Anelloviridae	Mastadenovirus	vertebrates| human
NC_019721.1	Enterobacterial phage mEp390	dsDNA viruses	Negarnaviricota	Caudovirales	Siphoviridae	Hk97virus	bacteria
NC_014635.1	Aeromonas phage phiAS4	dsDNA viruses	Negarnaviricota	Caudovirales	Myoviridae	Secunda5virus	bacteria
NC_019543.1	Aeromonas phage Aes508	dsDNA viruses	Negarnaviricota	Caudovirales	Myoviridae	Secunda5virus	bacteria
NC_019450.1	Pseudomonas phage JG004	dsDNA viruses	Negarnaviricota	Caudovirales	Myoviridae	Pakpunavirus	bacteria
NC_028685.1	Shigella phage Ss-VASD	dsDNA viruses	Negarnaviricota	Caudovirales	Podoviridae	Tl2011virus	bacteria
NC_001362.1	Friend murine leukemia virus	Not classified	Negarnaviricota	Ortervirales	Retroviridae	Gammaretrovirus	vertebrates
NC_022986.1	Pseudomonas phage PAK_P4	dsDNA viruses	Negarnaviricota	Caudovirales	Myoviridae	Pakpunavirus	bacteria
NC_019913.1	Pseudomonas phage PaP1	dsDNA viruses	Negarnaviricota	Caudovirales	Myoviridae	Pakpunavirus	bacteria
NC_025830.1	Escherichia phage Av-05	dsDNA viruses	Negarnaviricota	Caudovirales	Myoviridae	unclassified bacterial viruses	bacteria
NC_016571.1	Pseudomonas phage OBP	dsDNA viruses	Negarnaviricota	Caudovirales	Myoviridae	unclassified bacterial viruses	bacteria
NC_006552.1	Pseudomonas virus F116	dsDNA viruses	Negarnaviricota	Caudovirales	Podoviridae	F116virus	bacteria
NC_026014.1	Enterobacteria phage P88	dsDNA viruses	Negarnaviricota	Caudovirales	Myoviridae	P2virus	bacteria
NC_023561.1	Enterobacter phage PG7	dsDNA viruses	Negarnaviricota	Caudovirales	Myoviridae	Cc31virus	bacteria
NC_028750.1	Klebsiella phage Matisse	dsDNA viruses	Negarnaviricota	Caudovirales	Myoviridae	Kp15virus	bacteria
NC_015294.2	Pseudomonas phage PAK_P1	dsDNA viruses	Negarnaviricota	Caudovirales	Myoviridae	Pakpunavirus	bacteria
NC_020879.1	Aeromonas phage Aes012	dsDNA viruses	Negarnaviricota	Caudovirales	Myoviridae	Secunda5virus	bacteria
NC_010393.1	Phage Gifsy-2	Not classified	unclassified bacterial viruses	unclassified bacterial viruses	unclassified bacterial viruses	unclassified bacterial viruses	bacteria
NC_014036.1	Klebsiella phage KP15	dsDNA viruses	Negarnaviricota	Caudovirales	Myoviridae	Kp15virus	bacteria
NC_031110.1	Pseudomonas phage phiMK	dsDNA viruses	Negarnaviricota	Caudovirales	Myoviridae	Pakpunavirus	bacteria
NC_019401.1	Cronobacter phage vB_CsaM_GAP32	dsDNA viruses	Negarnaviricota	Caudovirales	Myoviridae	unclassified bacterial viruses	bacteria
NC_028977.1	Klebsiella phage vB_KpnP_KpV289	dsDNA viruses	Negarnaviricota	Caudovirales	Podoviridae	Kp32virus	bacteria
NC_030910.1	Pseudomonas phage K5	dsDNA viruses	Negarnaviricota	Caudovirales	Myoviridae	Pakpunavirus	bacteria
NC_028817.1	Pseudomonas phage K8	dsDNA viruses	Negarnaviricota	Caudovirales	Myoviridae	Pakpunavirus	bacteria
NC_031065.1	Salmonella phage vB_SnwM_CGG4-1	dsDNA viruses	Negarnaviricota	Caudovirales	Myoviridae	S16virus	bacteria
NC_031946.1	Salmonella Phage 103203_sal5	dsDNA viruses	Negarnaviricota	Caudovirales	Podoviridae	P22virus	bacteria
NC_028772.1	Enterobacter phage phiEap-1	dsDNA viruses	Negarnaviricota	Caudovirales	Podoviridae	Kp32virus	bacteria
NC_031073.1	Pseudomonas phage vB_PaeM_MAG1	dsDNA viruses	Negarnaviricota	Caudovirales	Myoviridae	Pakpunavirus	bacteria
NC_031087.1	Klebsiella phage vB_KpnM_KpV477	dsDNA viruses	Negarnaviricota	Caudovirales	Myoviridae	Jd18virus	bacteria
NC_029083.1	Pseudomonas phage PaoP5	dsDNA viruses	Negarnaviricota	Caudovirales	Myoviridae	Pakpunavirus	bacteria
NC_020080.1	Klebsiella phage KP27	dsDNA viruses	Negarnaviricota	Caudovirales	Myoviridae	Kp15virus	bacteria
NC_011043.1	Klebsiella phage K11	dsDNA viruses	Negarnaviricota	Caudovirales	Podoviridae	Kp32virus	bacteria
NC_022967.1	Pseudomonas phage PAK_P2	dsDNA viruses	Negarnaviricota	Caudovirales	Myoviridae	Pakpunavirus	bacteria
NC_001962.1	Bombyx mori NPV	dsDNA viruses	Negarnaviricota	Tymovirales	Baculoviridae	Alphabaculovirus	invertebrates
NC_010392.1	Phage Gifsy-1	Not classified	unclassified bacterial viruses	unclassified bacterial viruses	unclassified bacterial viruses	unclassified bacterial viruses	bacteria
NC_028652.1	Pseudomonas phage C11	dsDNA viruses	Negarnaviricota	Caudovirales	Myoviridae	Pakpunavirus	bacteria
AC_000007.1	Human adenovirus 2	dsDNA viruses	Negarnaviricota	Tymovirales	Adenoviridae	Mastadenovirus	vertebrates| human
NC_022750.1	Enterobacteria phage fiAA91-ss	dsDNA viruses	Negarnaviricota	Caudovirales	Myoviridae	P2virus	bacteria
NC_005056.1	Bacteriophage WPhi	dsDNA viruses	Negarnaviricota	Caudovirales	Myoviridae	P2virus	bacteria
NC_015265.1	Burkholderia phage KS5	dsDNA viruses	Negarnaviricota	Caudovirales	Myoviridae	P2virus	bacteria
NC_008725.1	Maruca vitrata MNPV	dsDNA viruses	Negarnaviricota	Tymovirales	Baculoviridae	Alphabaculovirus	invertebrates
NC_031020.1	Morganella phage vB_MmoM_MP1	dsDNA viruses	Negarnaviricota	Caudovirales	Myoviridae	unclassified bacterial viruses	bacteria
NC_007804.2	Escherichia phage phiV10	dsDNA viruses	Negarnaviricota	Caudovirales	Podoviridae	Epsilon15virus	bacteria
NC_029102.1	Enterobacter phage E-2	dsDNA viruses	Negarnaviricota	Caudovirales	Podoviridae	T7virus	bacteria
NC_030901.1	Gordonia phage ClubL	dsDNA viruses	Negarnaviricota	Caudovirales	Siphoviridae	Smoothievirus	bacteria
NC_027399.1	Klebsiella phage K64-1	dsDNA viruses	Negarnaviricota	Caudovirales	Myoviridae	unclassified bacterial viruses	bacteria
NC_014458.1	Mycobacterium phage Angelica	dsDNA viruses	Negarnaviricota	Caudovirales	Siphoviridae	Tm4virus	bacteria
NC_009234.1	Burkholderia phage phiE202	dsDNA viruses	Negarnaviricota	Caudovirales	Myoviridae	P2virus	bacteria
NC_021569.1	Stenotrophomonas phage phiSMA7	ssDNA viruses	Negarnaviricota	Tymovirales	Inoviridae	unclassified bacterial viruses	bacteria
NC_027364.1	Escherichia phage PBECO 4	dsDNA viruses	Negarnaviricota	Caudovirales	Myoviridae	unclassified bacterial viruses	bacteria
NC_001697.1	Haemophilus phage HP1	dsDNA viruses	Negarnaviricota	Caudovirales	Myoviridae	Hp1virus	bacteria
NC_019526.1	Enterobacteria phage vB_KleM-RaK2	dsDNA viruses	Negarnaviricota	Caudovirales	Myoviridae	unclassified bacterial viruses	bacteria
NC_004775.1	Enterobacteria phage epsilon15	dsDNA viruses	Negarnaviricota	Caudovirales	Podoviridae	Epsilon15virus	bacteria
NC_015266.1	Burkholderia phage KL3	dsDNA viruses	Negarnaviricota	Caudovirales	Myoviridae	P2virus	bacteria
NC_019442.1	Escherichia phage TL-2011c	dsDNA viruses	Negarnaviricota	Caudovirales	Podoviridae	Tl2011virus	bacteria
AC_000017.1	Human adenovirus type 1	dsDNA viruses	Negarnaviricota	Tymovirales	Adenoviridae	Mastadenovirus	vertebrates| human
NC_031092.1	Citrobacter phage SH2	dsDNA viruses	Negarnaviricota	Caudovirales	Podoviridae	T7virus	bacteria
NC_030696.1	Gordonia phage Smoothie	dsDNA viruses	Negarnaviricota	Caudovirales	Siphoviridae	Smoothievirus	bacteria
NC_028499.1	Penicillium aurantiogriseum partitivirus 1	dsRNA viruses	Negarnaviricota	Tymovirales	Partitiviridae	unclassified viruses	plants
NC_028660.1	Escherichia phage phi191	dsDNA viruses	Negarnaviricota	Caudovirales	Podoviridae	Tl2011virus	bacteria
NC_018846.1	Escherichia phage P13374	dsDNA viruses	Negarnaviricota	Caudovirales	Podoviridae	Tl2011virus	bacteria
NC_005340.1	Enterobacteria phage PsP3	dsDNA viruses	Negarnaviricota	Caudovirales	Myoviridae	P2virus	bacteria
NC_028935.1	Escherichia phage SUSP2	dsDNA viruses	Negarnaviricota	Caudovirales	Myoviridae	Suspvirus	bacteria
NC_023719.1	Bacillus phage G	dsDNA viruses	Negarnaviricota	Caudovirales	Myoviridae	unclassified bacterial viruses	bacteria
NC_007710.1	Xanthomonas oryzae phage OP2	dsDNA viruses	Negarnaviricota	Caudovirales	Myoviridae	Bcep78virus	bacteria
NC_001895.1	Enterobacteria phage P2	dsDNA viruses	Negarnaviricota	Caudovirales	Myoviridae	P2virus	bacteria
NC_031029.1	Gordonia phage Cucurbita	dsDNA viruses	Negarnaviricota	Caudovirales	Siphoviridae	Smoothievirus	bacteria
NC_030297.1	Torque teno mini virus 18	ssDNA viruses	Negarnaviricota	Tymovirales	Anelloviridae	Betatorquevirus	human
NC_031066.1	Citrobacter phage SH1	dsDNA viruses	Negarnaviricota	Caudovirales	Podoviridae	T7virus	bacteria
NC_004745.1	Yersinia phage L-413C	dsDNA viruses	Negarnaviricota	Caudovirales	Myoviridae	P2virus	bacteria
NC_004812.1	Macacine herpesvirus 1	dsDNA viruses	Negarnaviricota	Herpesvirales	Herpesviridae	Simplexvirus	vertebrates
NC_030936.1	Gordonia phage Bachita	dsDNA viruses	Negarnaviricota	Caudovirales	Siphoviridae	Smoothievirus	bacteria
NC_031074.1	Gordonia phage Bantam	dsDNA viruses	Negarnaviricota	Caudovirales	Siphoviridae	Smoothievirus	bacteria
NC_028896.1	Escherichia phage pro147	dsDNA viruses	Negarnaviricota	Caudovirales	Myoviridae	P2virus	bacteria
NC_003315.1	Haemophilus phage HP2	dsDNA viruses	Negarnaviricota	Caudovirales	Myoviridae	Hp1virus	bacteria
NC_014663.1	Acinetobacter phage Acj9	dsDNA viruses	Negarnaviricota	Caudovirales	Myoviridae	unclassified bacterial viruses	bacteria
NC_032770.1	Hubei picorna-like virus 36	Not classified	unclassified viruses	unclassified viruses	unclassified viruses	unclassified viruses	invertebrates
NC_001405.1	Human adenovirus C	dsDNA viruses	Negarnaviricota	Tymovirales	Adenoviridae	Mastadenovirus	vertebrates| human
NC_009424.4	Woolly monkey sarcoma virus	Not classified	Negarnaviricota	Ortervirales	Retroviridae	Gammaretrovirus	vertebrates
NC_014661.1	Acinetobacter phage Acj61	dsDNA viruses	Negarnaviricota	Caudovirales	Myoviridae	unclassified bacterial viruses	bacteria
NC_007145.2	Burkholderia prophage phi52237	dsDNA viruses	Negarnaviricota	Caudovirales	Myoviridae	P2virus	bacteria
NC_009225.1	Torque teno midi virus 1	ssDNA viruses	Negarnaviricota	Tymovirales	Anelloviridae	Gammaretrovirus	vertebrates| human
NC_001317.1	Bacteriophage 186	dsDNA viruses	Negarnaviricota	Caudovirales	Myoviridae	P2virus	bacteria
NC_019510.1	Erwinia phage vB_EamP-L1	dsDNA viruses	Negarnaviricota	Caudovirales	Podoviridae	T7virus	bacteria
NC_028655.1	Yersinia phage vB_YenP_AP10	dsDNA viruses	Negarnaviricota	Caudovirales	Podoviridae	T7virus	bacteria
NC_021331.1	Shigella phage pSf-1	dsDNA viruses	Negarnaviricota	Caudovirales	Siphoviridae	unclassified bacterial viruses	bacteria
NC_029015.2	Salmonella phage SEN4	dsDNA viruses	Negarnaviricota	Caudovirales	Myoviridae	P2virus	bacteria
NC_016158.1	Escherichia phage HK639	dsDNA viruses	Negarnaviricota	Caudovirales	Siphoviridae	unclassified bacterial viruses	bacteria
NC_019545.1	Salmonella phage SPN3UB	dsDNA viruses	Negarnaviricota	Caudovirales	Siphoviridae	unclassified bacterial viruses	bacteria
NC_001501.1	Moloney murine leukemia virus	Not classified	Negarnaviricota	Ortervirales	Retroviridae	Gammaretrovirus	vertebrates
NC_007346.1	Emiliania huxleyi virus 86	dsDNA viruses	Negarnaviricota	Tymovirales	Phycodnaviridae	Coccolithovirus	algae
NC_026764.1	Simian torque teno virus 33	ssDNA viruses	Negarnaviricota	Tymovirales	Anelloviridae	Alphatorquevirus	vertebrates| human
NC_030697.1	Picornavirales Bu-3	ssRNA viruses	unclassified viruses	unclassified viruses	unclassified viruses	unclassified viruses	vertebrates
NC_007014.1	Small anellovirus 2	ssDNA viruses	Negarnaviricota	Tymovirales	Anelloviridae	unclassified viruses	vertebrates| human
NC_003298.1	Enterobacteria phage T3	dsDNA viruses	Negarnaviricota	Caudovirales	Podoviridae	T7virus	bacteria
NC_009236.1	Burkholderia phage phiE12-2	dsDNA viruses	Negarnaviricota	Caudovirales	Myoviridae	P2virus	bacteria
NC_031281.1	Mycobacterium phage Panchino	dsDNA viruses	Negarnaviricota	Caudovirales	Siphoviridae	Redivirus	bacteria
NC_001499.1	Abelson murine leukemia virus	Not classified	Negarnaviricota	Ortervirales	Retroviridae	Gammaretrovirus	vertebrates
NC_019410.1	Caulobacter phage CcrKarma	dsDNA viruses	Negarnaviricota	Caudovirales	Siphoviridae	Phicbkvirus	bacteria
NC_011589.1	Stenotrophomonas phage S1	dsDNA viruses	Negarnaviricota	Caudovirales	Siphoviridae	unclassified bacterial viruses	bacteria
NC_031042.1	Salmonella phage NR01	dsDNA viruses	Negarnaviricota	Caudovirales	Siphoviridae	T5virus	bacteria
NC_020866.1	Rhodovulum phage RS1	dsDNA viruses	Negarnaviricota	Caudovirales	Siphoviridae	unclassified bacterial viruses	bacteria
NC_031010.1	Erwinia phage vB_EamM_Kwan	dsDNA viruses	Negarnaviricota	Caudovirales	Myoviridae	Spn3virus	bacteria
NC_031904.1	Flavobacterium phage Fpv3	Not classified	unclassified bacterial viruses	unclassified bacterial viruses	unclassified bacterial viruses	unclassified bacterial viruses	bacteria
NC_015463.1	Synechococcus phage S-CBS2	dsDNA viruses	Negarnaviricota	Caudovirales	Siphoviridae	unclassified bacterial viruses	bacteria
NC_019411.1	Caulobacter phage CcrSwift	dsDNA viruses	Negarnaviricota	Caudovirales	Siphoviridae	Phicbkvirus	bacteria
NC_018087.3	Acinetobacter phage ZZ1	dsDNA viruses	Negarnaviricota	Caudovirales	Myoviridae	unclassified bacterial viruses	bacteria
NC_010342.1	Halomonas phage phiHAP-1	dsDNA viruses	Negarnaviricota	Caudovirales	Myoviridae	Hapunavirus	bacteria
NC_011273.1	Mycobacterium phage Myrna	dsDNA viruses	Negarnaviricota	Caudovirales	Myoviridae	unclassified bacterial viruses	bacteria
NC_034249.1	Kaumoebavirus isolate Sc	Not classified	unclassified viruses	unclassified viruses	unclassified viruses	unclassified viruses	protozoa
NC_004629.1	Pseudomonas phage phiKZ	dsDNA viruses	Negarnaviricota	Caudovirales	Siphoviridae	Phicbkvirus	bacteria
NC_028779.1	Mycobacterium phage Carcharodon	dsDNA viruses	Negarnaviricota	Caudovirales	Siphoviridae	Charlievirus	bacteria
NC_001502.1	Moloney murine sarcoma virus	Not classified	Negarnaviricota	Ortervirales	Retroviridae	Gammaretrovirus	vertebrates
NC_027292.1	Pseudomonas phage Pf-10	dsDNA viruses	Negarnaviricota	Caudovirales	Podoviridae	T7virus	bacteria
NC_026611.1	Edwardsiella phage GF-2	dsDNA viruses	Negarnaviricota	Caudovirales	Myoviridae	unclassified bacterial viruses	bacteria
NC_015586.1	Stenotrophomonas phage phiSHP2	ssDNA viruses	Negarnaviricota	Tymovirales	Inoviridae	unclassified bacterial viruses	bacteria
NC_019405.1	Caulobacter phage phiCbK	dsDNA viruses	Negarnaviricota	Caudovirales	Siphoviridae	Phicbkvirus	bacteria
NC_028828.1	Mycobacterium phage TheloniousMonk	dsDNA viruses	Negarnaviricota	Caudovirales	Siphoviridae	L5virus	bacteria
NC_023729.1	Mycobacterium phage Charlie	dsDNA viruses	Negarnaviricota	Caudovirales	Siphoviridae	Charlievirus	bacteria
NC_028701.2	Salmonella phage SEN5	dsDNA viruses	Negarnaviricota	Caudovirales	Myoviridae	P2virus	bacteria
NC_028860.1	Mycobacterium phage Smeadley	dsDNA viruses	Negarnaviricota	Caudovirales	Siphoviridae	L5virus	bacteria
NC_011588.1	Oryctes rhinoceros virus	dsDNA viruses	Negarnaviricota	Tymovirales	Nudiviridae	Alphanudivirus	invertebrates
NC_010807.1	Salmonella phage phiSG-JL2	dsDNA viruses	Negarnaviricota	Caudovirales	Podoviridae	T7virus	bacteria
NC_031258.1	Salmonella phage BP12A	dsDNA viruses	Negarnaviricota	Caudovirales	Podoviridae	T7virus	bacteria
NC_028880.1	Citrobacter phage phiCFP-1	dsDNA viruses	Negarnaviricota	Caudovirales	Podoviridae	T7virus	bacteria
NC_019918.1	Pseudomonas phage vB_PaeM_C2-10_Ab1	dsDNA viruses	Negarnaviricota	Caudovirales	Myoviridae	Pakpunavirus	bacteria
NC_019407.1	Caulobacter phage CcrMagneto	dsDNA viruses	Negarnaviricota	Caudovirales	Siphoviridae	Phicbkvirus	bacteria
NC_028657.1	Pseudomonas phage YMC11/02/R656	dsDNA viruses	Negarnaviricota	Caudovirales	Siphoviridae	unclassified bacterial viruses	bacteria
NC_014662.1	Enterobacteria phage CC31	dsDNA viruses	Negarnaviricota	Caudovirales	Myoviridae	Cc31virus	bacteria
NC_023500.1	Staphylococcus phage StauST398-5	dsDNA viruses	Negarnaviricota	Caudovirales	Siphoviridae	Phietavirus	bacteria
NC_014093.1	Torque teno midi virus 2	ssDNA viruses	Negarnaviricota	Tymovirales	Anelloviridae	Gammatorquevirus	vertebrates| human
NC_024792.1	Bacillus phage Bobb	dsDNA viruses	Negarnaviricota	Caudovirales	Myoviridae	Agatevirus	bacteria
NC_028699.1	Salmonella phage SEN34	dsDNA viruses	Negarnaviricota	Caudovirales	Myoviridae	unclassified bacterial viruses	bacteria
NC_031107.1	Erwinia phage vB_EamM_Asesino	dsDNA viruses	Negarnaviricota	Caudovirales	Myoviridae	Spn3virus	bacteria
NC_025451.1	Yersinia phage vB_YenP_AP5	dsDNA viruses	Negarnaviricota	Caudovirales	Podoviridae	T7virus	bacteria
NC_030931.1	Pseudomonas phage phi2	dsDNA viruses	Negarnaviricota	Caudovirales	Siphoviridae	unclassified bacterial viruses	bacteria
NC_007013.1	Small anellovirus 1	ssDNA viruses	Negarnaviricota	Tymovirales	Anelloviridae	unclassified viruses	vertebrates| human
NC_029003.2	Salmonella phage SEN1	dsDNA viruses	Negarnaviricota	Caudovirales	Myoviridae	P2virus	bacteria
NC_023573.1	Staphylococcus phage phiSA012	dsDNA viruses	Negarnaviricota	Caudovirales	Myoviridae	Kayvirus	bacteria
NC_001271.1	Yersinia phage phiYeO3-12	dsDNA viruses	Negarnaviricota	Caudovirales	Podoviridae	T7virus	bacteria
NC_028800.1	Klebsiella phage K5	dsDNA viruses	Negarnaviricota	Caudovirales	Podoviridae	Kp32virus	bacteria
NC_019927.1	Cronobacter phage ENT47670	dsDNA viruses	Negarnaviricota	Caudovirales	Myoviridae	unclassified bacterial viruses	bacteria
NC_031243.1	Mycobacterium phage Xeno	dsDNA viruses	Negarnaviricota	Caudovirales	Siphoviridae	Charlievirus	bacteria
NC_031266.1	Mycobacterium phage Phrann	dsDNA viruses	Negarnaviricota	Caudovirales	Siphoviridae	Redivirus	bacteria
NC_019945.1	Thysanoplusia orichalcea NPV	dsDNA viruses	Negarnaviricota	Tymovirales	Baculoviridae	Alphabaculovirus	invertebrates
NC_023572.1	Mycobacterium phage MichelleMyBell	dsDNA viruses	Negarnaviricota	Caudovirales	Siphoviridae	Buttersvirus	bacteria

## Sheet: Table S2
Supplementary Table 2.Detected viruses characteristic (except phage) in PBMCs of SLE patients and Normal controls.
Accession Number	Species	Host	number of individual		number of sequencing reads per individual				abundance of viral genomes per individual
			HC	SLE	HC		SLE		HC	SLE
					median	maximum	median	maximum	mean	mean
NC_006273.2	Human herpesvirus 5 strain Merlin	vertebrates| human	2 (20%)	2 (20%)	2	2	148.5	280	5.2714e-05	0.00380314
NC_009333.1	Human herpesvirus 8	vertebrates| human	4 (40%)	0	13	25	NA	0	0.00148277	0
NC_009334.1	Human herpesvirus 4 type 2	vertebrates| human	1 (10%)	5 (50%)	4	4	4	22	8.0357e-05	0.000887307
NC_007605.1	Human herpesvirus 4	vertebrates| human	1 (10%)	5 (50%)	4	4	4	22	8.07971e-05	0.000892167
NC_018464.1	Shamonda virus	vertebrates| invertebrates| human	6 (60%)	5 (50%)	29.5	175	34	72	0.929771	0.460942
NC_014078.1	Torque teno virus 19	vertebrates| human	1 (10%)	3 (30%)	1	1	2	256	0.000913901	0.207974
NC_014084.1	Torque teno virus 8	vertebrates| human	1 (10%)	3 (30%)	1	1	2	80	0.000918242	0.0666941
NC_001669.1	Simian virus 40	vertebrates| human	0	4 (40%)	NA	0	5	68	0	0.0462396
NC_015783.1	Torque teno virus	vertebrates| human	0	1 (10%)	NA	0	78	78	0	0.0641505
NC_014096.1	Torque teno virus 15	vertebrates| human	2 (20%)	1 (10%)	1	1	68	68	0.00164256	0.0550104
NC_014076.1	Torque teno virus 10	vertebrates| human	1 (10%)	3 (30%)	1	1	2	65	0.000923113	0.0546331
NC_014094.1	Torque teno virus 6	vertebrates| human	1 (10%)	2 (20%)	1	1	33.5	65	0.000939308	0.054812
NC_014080.1	Torque teno virus 7	vertebrates| human	1 (10%)	2 (20%)	1	1	32	62	0.000931514	0.0518971
NC_002076.2	Torque teno virus 1	vertebrates| human	1 (10%)	2 (20%)	1	1	31	59	0.000903462	0.0484603
NC_014073.1	Torque teno virus 28	vertebrates| human	1 (10%)	2 (20%)	1	1	31	60	0.000958979	0.0517389
NC_014081.1	Torque teno virus 3	vertebrates| human	0	2 (20%)	NA	0	30	59	0	0.0492238
NC_014075.1	Torque teno virus 12	vertebrates| human	1 (10%)	3 (30%)	1	1	2	55	0.000925814	0.0468691
NC_014074.1	Torque teno virus 27	vertebrates| human	0	2 (20%)	NA	0	21.5	41	0	0.0347418
NC_014091.1	Torque teno virus 16	vertebrates| human	0	1 (10%)	NA	0	41	41	0	0.0328988
NC_001526.4	Human papillomavirus type 16	vertebrates| human	4 (40%)	0	6	18	NA	0	0.0126135	0
NC_014077.1	Torque teno virus 14	vertebrates| human	0	1 (10%)	NA	0	21	21	0	0.0165005
NC_014480.2	Torque teno virus 2	vertebrates| human	0	1 (10%)	NA	0	13	13	0	0.0119888
NC_014069.1	Torque teno virus 4	vertebrates| human	0	1 (10%)	NA	0	10	10	0	0.00830243
NC_026663.1	Simian torque teno virus 30	vertebrates| human	0	1 (10%)	NA	0	6	6	0	0.00508903
NC_026664.1	Simian torque teno virus 32	vertebrates| human	0	1 (10%)	NA	0	4	4	0	0.00321469
NC_026765.1	Simian torque teno virus 34	vertebrates| human	0	1 (10%)	NA	0	4	4	0	0.00338425
NC_026662.1	Simian torque teno virus 31	vertebrates| human	0	1 (10%)	NA	0	4	4	0	0.00313652
NC_014079.1	Torque teno virus 26	vertebrates| human	0	1 (10%)	NA	0	4	4	0	0.00322654
AC_000008.1	Human adenovirus 5	vertebrates| human	0	2 (20%)	NA	0	2	2	0	0.000338857
AC_000007.1	Human adenovirus 2	vertebrates| human	0	1 (10%)	NA	0	2	2	0	0.000168369
AC_000017.1	Human adenovirus type 1	vertebrates| human	0	1 (10%)	NA	0	2	2	0	0.000168069
NC_030297.1	Torque teno mini virus 18	human	0	1 (10%)	NA	0	2	2	0	0.00218594
NC_001405.1	Human adenovirus C	vertebrates| human	0	1 (10%)	NA	0	2	2	0	0.000168369
NC_009225.1	Torque teno midi virus 1	vertebrates| human	0	1 (10%)	NA	0	2	2	0	0.00188819
NC_026764.1	Simian torque teno virus 33	vertebrates| human	0	1 (10%)	NA	0	1	1	0	0.000811764
NC_007014.1	Small anellovirus 2	vertebrates| human	0	1 (10%)	NA	0	1	1	0	0.00116266
NC_014093.1	Torque teno midi virus 2	vertebrates| human	0	1 (10%)	NA	0	1	1	0	0.000941776
NC_007013.1	Small anellovirus 1	vertebrates| human	0	1 (10%)	NA	0	1	1	0	0.0013622
NC_008168.1	Choristoneura occidentalis granulovirus	invertebrates	4 (40%)	4 (40%)	2.5	3	9	13	0.000233932	0.000923959
NC_023483.1	Antheraea pernyi iflavirus	invertebrates	3 (30%)	3 (30%)	3	6	9	14	0.00375955	0.00997376
NC_013116.1	Sclerotinia gemycircularvirus 1	fungi	1 (10%)	3 (30%)	10	10	6	15	0.0161676	0.0468254
NC_003521.1	Panine herpesvirus 2	vertebrates	1 (10%)	1 (10%)	1	1	19	19	1.4396e-05	0.000238425
NC_030230.1	Tokyovirus A1	protozoa	0	2 (20%)	NA	0	10	13	0	0.000163062
NC_006150.1	Macacine herpesvirus 3	vertebrates	1 (10%)	1 (10%)	1	1	17	17	1.56723e-05	0.000232241
NC_033176.1	Cynomolgus cytomegalovirus	vertebrates	1 (10%)	1 (10%)	1	1	17	17	1.54898e-05	0.000229536
NC_012783.2	Cercopithecine herpesvirus 5	vertebrates	1 (10%)	1 (10%)	1	1	17	17	1.53432e-05	0.000227363
NC_006146.1	Macacine herpesvirus 4	vertebrates	1 (10%)	3 (30%)	4	4	1	11	8.11404e-05	0.000275145
NC_001407.1	Rous sarcoma virus	vertebrates	1 (10%)	2 (20%)	1	1	7	13	0.000303587	0.00449507
NC_029853.1	Mus musculus mobilized endogenous polytropic provirus	vertebrates	1 (10%)	2 (20%)	2	2	4	4	0.000850577	0.00368307
NC_001623.1	Autographa californica nucleopolyhedrovirus	invertebrates	2 (20%)	1 (10%)	4	6	2	2	0.000159678	4.31447e-05
NC_001702.1	Murine type C retrovirus	vertebrates	1 (10%)	2 (20%)	2	2	4	4	0.000855596	0.00370481
NC_007815.2	PreXMRV-1 provirus	vertebrates	1 (10%)	2 (20%)	4	4	2.5	4	0.00169825	0.00228747
NC_001500.1	Spleen focus-forming virus	vertebrates	1 (10%)	1 (10%)	4	4	2	2	0.00221101	0.0011876
NC_001506.1	Murine osteosarcoma virus	vertebrates	1 (10%)	1 (10%)	2	2	3	3	0.00182636	0.00294298
NC_001362.1	Friend murine leukemia virus	vertebrates	1 (10%)	1 (10%)	2	2	1	1	0.00083627	0.000456095
NC_001962.1	Bombyx mori NPV	invertebrates	1 (10%)	0	3	3	NA	0	6.4201e-05	0
NC_008725.1	Maruca vitrata MNPV	invertebrates	1 (10%)	0	2	2	NA	0	4.90934e-05	0
NC_028499.1	Penicillium aurantiogriseum partitivirus 1	plants	1 (10%)	0	2	2	NA	0	0.00323642	0
NC_004812.1	Macacine herpesvirus 1	vertebrates	1 (10%)	0	2	2	NA	0	3.49543e-05	0
NC_032770.1	Hubei picorna-like virus 36	invertebrates	1 (10%)	0	2	2	NA	0	0.000557646	0
NC_009424.4	Woolly monkey sarcoma virus	vertebrates	0	1 (10%)	NA	0	2	2	0	0.00144934
NC_001501.1	Moloney murine leukemia virus	vertebrates	0	1 (10%)	NA	0	1	1	0	0.000455602
NC_007346.1	Emiliania huxleyi virus 86	algae	0	1 (10%)	NA	0	1	1	0	7.09e-06
NC_030697.1	Picornavirales Bu-3	vertebrates	1 (10%)	0	1	1	NA	0	0.000279387	0
NC_001499.1	Abelson murine leukemia virus	vertebrates	0	1 (10%)	NA	0	1	1	0	0.000634333
NC_034249.1	Kaumoebavirus isolate Sc	protozoa	1 (10%)	0	1	1	NA	0	9.9e-06	0
NC_001502.1	Moloney murine sarcoma virus	vertebrates	0	1 (10%)	NA	0	1	1	0	0.000650794
NC_011588.1	Oryctes rhinoceros virus	invertebrates	1 (10%)	0	1	1	NA	0	2.72706e-05	0
NC_019945.1	Thysanoplusia orichalcea NPV	invertebrates	1 (10%)	0	1	1	NA	0	2.06657e-05	0

## Sheet: Table S3
Supplementary Table 3. Summary of Spearman rank Correlation Analysis of Human DEGs and candicate marker viruses.
NOTE. Taxonomic pairs with significant differential correlations between two groups as determined by Spearman’s statistics (P < 0.05) and correlation coefficient (≥ 0.6) were selected for visualizations.
GeneSymbol	Human herpesvirus 8	Salmonella phage STP4-a	Salmonella phage S16	Enterobacteria phage mEp460	Enterobacteria phage QL01	Human papillomavirus type 16	Synechococcus phage S RIM2	Synechococcus phage S CAM7
WNT16	0.586157	-0.15595	-0.15595	-0.398771	-0.14627	0.629178	-0.208028	-0.208028
IGF1	-0.650715	0.0520572	0.0520572	0.325603	0.126889	-0.10303	-0.1805	-0.1805
CYP46A1	-0.643939	0.068859	0.068859	0.499534	-0.00430369	-0.515367	0.307319	0.307319
ZZZ3	0.656707	-0.335021	-0.335021	-0.335429	-0.316131	0.606704	0.0174939	0.0174939
USE1	-0.545287	0.429132	0.429132	0.631682	0.33341	-0.485058	-0.353163	-0.353163
SEZ6	0.468926	-0.396866	-0.396866	-0.603451	-0.276408	0.605516	0.232217	0.232217
ROCK1	-0.57777	0.180217	0.180217	0.601912	0.00860738	-0.433597	0.210526	0.210526
VPS35	-0.175005	0.264961	0.264961	0.681552	0.152107	-0.399078	-0.15695	-0.15695
RPS6KA2	0.602516	-0.177527	-0.177527	-0.487178	-0.234013	0.421761	-0.0193587	-0.0193587
TRNT1	0.547349	-0.15546	-0.15546	-0.712886	-0.114436	0.561384	-0.225811	-0.225811
VPS9D1	0.665129	-0.202265	-0.202265	-0.211979	-0.302034	-0.0185364	0.224389	0.224389
MOCOS	-0.345631	0.0425309	0.0425309	0.686273	0.117364	-0.488298	0.128348	0.128348
RBM7	-0.606282	0.299644	0.299644	0.455406	0.427141	-0.411002	0.111312	0.111312
SMC1B	0.377507	-0.19682	-0.19682	-0.691674	-0.273181	0.287163	0.215284	0.215284
MPP4	-0.631329	0.532381	0.532381	0.529343	0.407621	-0.485058	-0.111271	-0.111271
CD82	-0.684029	0.447415	0.447415	0.351131	0.345241	-0.402244	0.096757	0.096757
POMGNT1	-0.461397	0.661443	0.661443	0.324663	0.597988	-0.387186	-0.283014	-0.283014
RPLP0	0.810195	-0.353356	-0.353356	-0.202899	-0.353356	0.172892	0.187328	0.187328
LZTR1	0.606592	-0.262426	-0.262426	-0.656385	-0.355996	0.354921	0.176582	0.176582
ADRBK2	-0.624876	0.176385	0.176385	0.416416	0.30222	-0.495814	0.312041	0.312041
GTPBP1	0.608743	-0.0516248	-0.0516248	-0.409358	0.0537759	0.496889	-0.464434	-0.464434
TIMP3	0.669788	-0.1962	-0.1962	-0.519822	-0.200711	0.470204	-0.190203	-0.190203
MTHFD1	-0.425905	0.214028	0.214028	0.446412	0.0483983	-0.617347	0.222541	0.222541
CINP	-0.377507	0.429132	0.429132	0.522285	0.164554	-0.613045	0.0193514	0.0193514
BMP7	-0.488285	0.16563	0.16563	0.458764	0.100023	-0.656066	0.244312	0.244312
SLC30A4	0.0640359	-0.186681	-0.186681	-0.188745	-0.466703	-0.00976819	0.62735	0.62735
PLAT	0.0752862	-0.148421	-0.148421	-0.368775	-0.20865	0.0387186	0.611988	0.611988
CNTNAP1	0.625111	-0.108668	-0.108668	-0.620446	-0.0667072	0.460495	-0.203266	-0.203266
SH3D19	0.0634555	-0.462473	-0.462473	-0.337015	-0.49904	0.214028	0.619245	0.619245
GAPDH	0.684029	-0.641008	-0.641008	-0.280552	-0.600139	0.350619	0.0193514	0.0193514
SENP6	-0.645311	0.416225	0.416225	0.307019	0.127987	-0.462473	0.191095	0.191095
SLC35F5	-0.649613	0.15595	0.15595	0.527578	0.173158	-0.45817	0.353163	0.353163
PRRC2C	-0.488285	0.349543	0.349543	0.50464	0.171007	-0.629178	0.111271	0.111271
MYB	-0.399705	0.617579	0.617579	0.285953	0.563783	-0.463722	-0.14035	-0.14035
AVPI1	0.137682	-0.370766	-0.370766	-0.430415	-0.501943	0.0162617	0.626631	0.626631
ECHDC2	-0.359223	0.560345	0.560345	0.372304	0.615196	-0.423754	-0.186257	-0.186257
SEC22A	-0.449566	0.439887	0.439887	0.359953	0.298994	-0.67435	0.099176	0.099176
ACO1	-0.00107552	0.659292	0.659292	-0.155274	0.550665	0.168856	-0.619245	-0.619245
WDR83	0.633718	-0.252304	-0.252304	-0.565727	-0.304486	0.517519	0.14761	0.14761
SPATS2	-0.349543	0.365676	0.365676	0.564632	0.140893	-0.678652	0.0411217	0.0411217
METTL8	-0.613276	0.38249	0.38249	0.547193	0.333536	-0.610048	-0.014519	-0.014519
BAZ2B	-0.618655	0.328694	0.328694	0.452758	0.123193	-0.462647	0.234724	0.234724
LPGAT1	-0.219406	0.129062	0.129062	0.358189	0.0215104	-0.637782	-0.0411217	-0.0411217
ZNFX1	0.303296	-0.274257	-0.274257	-0.381127	-0.23984	0.150572	0.614407	0.614407
CEACAM8	-0.309328	0.188286	0.188286	0.630155	0.240469	-0.339453	0.0701752	0.0701752
ATXN1	-0.0172083	0.645311	0.645311	0.111162	0.572175	-0.180687	0.0290271	0.0290271
NSRP1	-0.641008	0.349543	0.349543	0.43759	0.285012	-0.464624	0.0096757	0.0096757
LAMA5	-0.637186	0.207731	0.207731	0.188941	0.254013	-0.43968	0.181556	0.181556
C19orf66	-0.509795	0.190367	0.190367	0.529343	0.114005	-0.635631	0.183838	0.183838
CA6	0.180959	-0.210042	-0.210042	-0.466524	-0.0904796	0.158339	0.615333	0.615333
VPS13B	-0.643159	0.20865	0.20865	0.603451	0.14627	-0.542061	0.256406	0.256406
SBF2	0.0494738	-0.349543	-0.349543	-0.0882238	-0.191442	-0.0924945	0.611988	0.611988
DPF2	-0.363124	0.0225944	0.0225944	0.75548	0.101137	-0.550872	0.0701752	0.0701752
DSC3	-0.609818	0.348468	0.348468	0.603451	0.24952	-0.497965	-0.0870813	-0.0870813
DMTF1	0.291465	-0.381809	-0.381809	-0.232911	-0.400093	0.265653	0.614407	0.614407
SRPK2	0.640712	-0.424989	-0.424989	-0.723707	-0.22702	0.619731	0.0169389	0.0169389
RPS6	0.379801	-0.458881	-0.458881	-0.344202	-0.685362	0.348599	0.29038	0.29038
TAF8	-0.50872	0.316202	0.316202	0.48876	0.157026	-0.63348	0.183838	0.183838
SYTL2	-0.2592	0.622725	0.622725	0.208208	0.617347	-0.439887	-0.118527	-0.118527
HERC6	-0.503342	0.645311	0.645311	0.257613	0.575402	-0.434509	-0.133041	-0.133041
LNX2	-0.529155	0.272106	0.272106	0.543458	0.315127	-0.684029	0.0483785	0.0483785
EFCAB11	-0.324387	0.00545188	0.00545188	0.688708	-0.0190816	-0.275865	-0.112808	-0.112808
DUOX2	-0.616272	0.60229	0.60229	0.310548	0.570024	-0.475379	-0.0774056	-0.0774056
CDAN1	0.545287	-0.232312	-0.232312	-0.605215	-0.0688331	0.503342	-0.258825	-0.258825
GALNT1	-0.13444	0.488285	0.488285	-0.037054	0.545287	-0.188216	-0.621664	-0.621664
STAC2	-0.421603	0.616272	0.616272	0.38642	0.466775	-0.464624	-0.152392	-0.152392
NLRP12	-0.606592	0.180687	0.180687	0.467586	0.143044	-0.562496	0.125784	0.125784
FHAD1	0.61978	-0.303297	-0.303297	-0.479555	-0.148352	0.278022	0.0123576	0.0123576
ANKMY1	-0.565722	0.328033	0.328033	0.38642	0.266728	-0.624876	0.166906	0.166906
OSBPL10	-0.600139	0.494738	0.494738	0.419945	0.310825	-0.44634	-0.11369	-0.11369
KIAA0226	-0.575883	0.208771	0.208771	0.659213	0.167559	-0.476649	0.0621992	0.0621992
PYURF	0.618423	-0.308674	-0.308674	-0.584041	-0.309749	0.544212	0.0507975	0.0507975
TBC1D32	-0.600139	0.0849659	0.0849659	0.582277	0.00107552	-0.397941	0.0217703	0.0217703
RBMX	-0.543341	0.292113	0.292113	0.616034	0.302872	-0.561631	-0.232304	-0.232304
NPFFR1	-0.491512	0.291465	0.291465	0.636976	0.181762	-0.637782	0.212866	0.212866
HMGA2	-0.615196	0.501191	0.501191	0.381127	0.345241	-0.534532	0.099176	0.099176
KLRF1	0.443113	-0.0752862	-0.0752862	-0.626389	-0.100023	0.470001	0.140298	0.140298
CCDC122	-0.480756	-0.0236614	-0.0236614	0.619331	-0.00752862	-0.492587	0.234636	0.234636
GPATCH11	-0.0634555	0.677576	0.677576	-0.00352895	0.600139	-0.0462473	-0.394285	-0.394285
ARL14EP	-0.331384	0.605744	0.605744	0.155332	0.559479	-0.138794	-0.612219	-0.612219
RASGRP3	-0.667896	0.217255	0.217255	0.287609	0.175309	-0.453868	0.195933	0.195933
PI4K2A	0.194669	-0.201122	-0.201122	-0.636976	-0.219406	0.344166	0.590218	0.590218
SPPL3	-0.652009	0.161388	0.161388	0.45011	0.250152	-0.557328	0.0992133	0.0992133
ZNF276	-0.114005	0.661443	0.661443	0.074108	0.586157	-0.179611	-0.38219	-0.38219
RAPGEF6	-0.430369	-0.00806942	-0.00806942	0.617799	0.161388	-0.565397	0.130671	0.130671
PSMB4	0.465699	-0.181762	-0.181762	-0.640505	-0.148421	0.586157	-0.0628921	-0.0628921
RLTPR	0.649382	-0.0878129	-0.0878129	-0.428636	-0.110579	0.440149	-0.253578	-0.253578
ZNF221	-0.487209	0.0817393	0.0817393	0.629918	-0.0376431	-0.471077	0.249149	0.249149
TAOK1	-0.331259	0.215104	0.215104	0.617566	0.145195	-0.492587	0.237055	0.237055
SHC1	-0.509795	-0.11508	-0.11508	0.617566	-0.0570024	-0.323731	0.263663	0.263663
FBLIM1	-0.614121	0.223708	0.223708	0.596393	0.116156	-0.507644	0.128203	0.128203
TM2D1	-0.380338	-0.0505683	-0.0505683	0.663692	0.147401	-0.443818	0.14035	0.14035
CDC42EP3	-0.137334	0.539528	0.539528	0.249448	0.685581	-0.0425082	-0.514793	-0.514793
C1orf106	-0.496889	0.558194	0.558194	0.411123	0.661443	-0.647462	0.0266082	0.0266082
SMIM14	-0.466412	0.25069	0.25069	0.670753	0.0753145	-0.398629	0.14035	0.14035
METAP1	-0.598856	0.146879	0.146879	0.513827	0.258118	-0.616676	0.0570813	0.0570813
IL15	-0.17746	0.523777	0.523777	0.0688145	0.480756	-0.091419	-0.614407	-0.614407
RICTOR	-0.689666	0.0774664	0.0774664	0.594852	0.200122	-0.365276	0.212946	0.212946
C8orf34	-0.490436	0.443113	0.443113	0.414652	0.238765	-0.649613	0.125784	0.125784
PGM2L1	-0.571315	0.205501	0.205501	0.607208	0.257683	-0.407774	0.0992133	0.0992133
C10orf32	-0.637782	0.285012	0.285012	0.576983	0.200046	-0.573251	0.215284	0.215284
ANAPC16	-0.368903	0.33341	0.33341	0.43759	0.2592	-0.635631	-0.0145136	-0.0145136
CENPV	0.43666	-0.420527	-0.420527	-0.629918	-0.360298	0.45817	0.191095	0.191095
EVA1C	0.418534	-0.413692	-0.413692	-0.305369	-0.307176	0.631566	-0.286751	-0.286751
SAMD14	0.601214	-0.288239	-0.288239	-0.67403	-0.35277	0.515173	0.217703	0.217703
SEMA6B	-0.0957211	0.645311	0.645311	-0.0423474	0.59261	-0.0537759	-0.440245	-0.440245
HOOK3	-0.600139	0.0871169	0.0871169	0.603451	0.03119	-0.507644	0.256406	0.256406
ZCCHC4	-0.670047	0.186065	0.186065	0.486995	0.141968	-0.433434	0.13546	0.13546
DFFB	-0.672198	0.443113	0.443113	0.38642	0.329108	-0.476454	0.0943381	0.0943381
FAM153A	-0.422657	0.547349	0.547349	0.47821	0.239128	-0.626698	-0.033993	-0.033993
TMEM192	-0.600139	0.295767	0.295767	0.543458	0.288239	-0.597988	0.099176	0.099176
CCDC144A	-0.617579	0.301258	0.301258	0.31596	0.178603	-0.413692	-0.104053	-0.104053
NAIF1	-0.247369	0.622725	0.622725	0.321135	0.550665	-0.537759	-0.186257	-0.186257
ZNF554	-0.522702	0.306523	0.306523	0.62286	0.349543	-0.56142	0.00483785	0.00483785
HINFP	-0.63348	0.264577	0.264577	0.515227	0.114005	-0.605516	0.099176	0.099176
PPP1CA	-0.190367	0.606592	0.606592	0.162332	0.516248	-0.372129	-0.541839	-0.541839
RND1	-0.471077	0.182838	0.182838	0.37054	-0.0494738	-0.635631	0.469272	0.469272
EFCAB12	-0.353168	0.482376	0.482376	0.239357	0.637426	-0.352092	-0.330556	-0.330556
FBXO45	-0.435748	0.11082	0.11082	0.605443	0.254994	-0.413154	0.043557	0.043557
C9orf131	0.678652	-0.091419	-0.091419	-0.389949	-0.286088	0.488285	-0.0677299	-0.0677299
TLR6	-0.625649	0.213033	0.213033	0.0917872	0.115124	-0.280816	0.0411372	0.0411372
PRPF8	-0.523777	-0.0150572	-0.0150572	0.610508	0.322655	-0.438811	0.0145136	0.0145136
ANKS4B	-0.617756	0.397437	0.397437	0.380055	0.541076	-0.322918	-0.110519	-0.110519
MRPL48	-0.529155	0.09357	0.09357	0.338779	0.161328	-0.692633	0.0822435	0.0822435
ZNF135	0.422678	-0.491512	-0.491512	-0.342308	-0.435585	0.18714	0.619245	0.619245
SCAND2P	0.325896	-0.322082	-0.322082	-0.595458	-0.347151	0.626724	0.254945	0.254945
STAP2	-0.609818	-0.0817393	-0.0817393	0.384656	0.0527004	-0.543136	0.304785	0.304785
ZNF713	-0.635631	0.425905	0.425905	0.444648	0.490436	-0.560345	-0.162068	-0.162068
EXD1	-0.622725	0.210801	0.210801	0.539929	0.15595	-0.485058	0.20319	0.20319
RP11-111M22.2	-0.684029	0.305447	0.305447	0.374069	0.0193593	-0.494738	0.237055	0.237055
AKAP5	0.35277	-0.27103	-0.27103	-0.224088	-0.2592	0.107552	0.611988	0.611988
HKR1	-0.556043	0.224783	0.224783	0.615802	0.148421	-0.532381	0.285433	0.285433
RP11-39K24.9	0.11508	0.643159	0.643159	-0.0829303	0.545287	-0.0258124	-0.575704	-0.575704
MXRA7	-0.49904	0.182838	0.182838	0.347602	0.13444	-0.624876	0.0483785	0.0483785
PAQR7	-0.424829	0.273181	0.273181	0.539929	0.42698	-0.644235	-0.241893	-0.241893
FMNL1	0.542061	-0.296843	-0.296843	-0.584041	-0.250596	0.607667	0.0507975	0.0507975
C6orf201	0.262426	-0.497965	-0.497965	-0.337015	-0.490436	0.17746	0.619245	0.619245
TRIM69	-0.399017	0.326957	0.326957	0.67403	0.224783	-0.590459	0.0628921	0.0628921
KIF18B	-0.605744	0.205501	0.205501	0.543663	0.0957571	-0.60951	0.0387174	0.0387174
ZNF555	-0.619498	0.219406	0.219406	0.573455	0.14627	-0.407621	-0.0774056	-0.0774056
HPDL	0.19682	-0.41515	-0.41515	-0.388185	-0.390413	0.153799	0.619245	0.619245
DNAJB13	0.53023	-0.22801	-0.22801	-0.63874	-0.347392	0.613045	0.0169325	0.0169325
CLEC17A	0.588596	-0.329398	-0.329398	-0.600646	-0.381238	0.518397	-0.259902	-0.259902
ZNF793	-0.52055	0.17746	0.17746	0.599922	0.0688331	-0.606592	0.198352	0.198352
ZNF669	-0.553892	0.272106	0.272106	0.776369	0.253822	-0.5711	0.137879	0.137879
RBM34	-0.643159	0.404395	0.404395	0.363482	0.515173	-0.511946	-0.149973	-0.149973
RIMKLBP1	-0.156735	0.633705	0.633705	0.223838	0.60777	-0.342787	-0.251068	-0.251068
ZNF527	-0.492772	0.175913	0.175913	0.63898	0.188286	-0.55679	0.106473	0.106473
NUGGC	-0.615046	0.556881	0.556881	0.51777	0.296213	-0.374844	0.121129	0.121129
ZNF431	-0.580779	0.100023	0.100023	0.460528	0.216179	-0.624876	0.142717	0.142717
WDR5B	0.21833	-0.466775	-0.466775	-0.509933	-0.363525	0.425905	0.619245	0.619245
FBXL22	0.600139	-0.14627	-0.14627	-0.52052	-0.23984	0.573251	-0.0193514	-0.0193514
PHACTR4	-0.514961	0.169495	0.169495	0.616359	0.186768	-0.503086	0.111691	0.111691
ZNF616	-0.563571	0.0451717	0.0451717	0.589335	-0.00860414	-0.610894	0.401542	0.401542
XKR4	-0.510179	0.192124	0.192124	0.492659	0.304601	-0.607048	0.199712	0.199712
NUP62	-0.652839	0.39579	0.39579	0.524049	0.293616	-0.45817	0.0193514	0.0193514
FGFR1OP	-0.649319	0.150629	0.150629	0.556019	-0.00107592	-0.405085	0.14035	0.14035
TSGA13	-0.56142	0.109703	0.109703	0.511698	0.149497	-0.616272	0.128203	0.128203
EMP2	-0.656066	0.125836	0.125836	0.599922	0.139817	-0.628102	0.280595	0.280595
TSPAN4	0.631329	-0.137666	-0.137666	-0.74108	-0.152723	0.556043	-0.142717	-0.142717
SMTNL1	0.0613045	0.632404	0.632404	-0.0864593	0.509795	-0.00430207	-0.510393	-0.510393
KRT18P39	0.586157	-0.351694	-0.351694	-0.75696	-0.308674	0.462473	-0.0435407	-0.0435407
CXCR2P1	0.204348	0.622725	0.622725	-0.0794014	0.424829	-0.276408	-0.40638	-0.40638
LDHBP1	-0.600139	0.255973	0.255973	0.589335	0.178536	-0.45817	0.200771	0.200771
RP11-307I14.3	0.603365	-0.160252	-0.160252	-0.534636	-0.138742	0.392564	-0.208028	-0.208028
FAM133B	-0.659292	0.27103	0.27103	0.534636	0.127987	-0.485058	0.268501	0.268501
DNM1P51	0.497076	-0.329232	-0.329232	-0.533955	-0.263601	0.672451	-0.00483967	-0.00483967
ZDHHC4P1	0.0483983	0.677576	0.677576	-0.00352895	0.579704	-0.0215104	-0.549096	-0.549096
INMT	-0.437736	0.636706	0.636706	0.280552	0.464624	-0.535608	0.0846624	0.0846624
PTCHD4	-0.563783	0.353978	0.353978	0.648689	0.360972	-0.561631	0.0338777	0.0338777
CTD-2060C23.1	0.00325109	-0.197233	-0.197233	-0.136898	-0.192898	-0.00650218	0.61908	0.61908
ENPP7P12	0.618423	-0.275332	-0.275332	-0.573455	-0.287163	0.507644	0.0895003	0.0895003
OLA1P3	-0.657141	0.656066	0.656066	0.478173	0.52055	-0.193593	-0.145136	-0.145136
AC006539.3	0.192518	-0.350619	-0.350619	-0.333486	-0.375356	0.100023	0.621664	0.621664
AC002451.1	-0.59261	0.610894	0.610894	0.536401	0.430207	-0.568949	-0.101595	-0.101595
RP11-511P7.4	0.665996	-0.434135	-0.434135	-0.483648	-0.595523	0.462647	0.113732	0.113732
RP11-156E8.1	0.552816	-0.563571	-0.563571	-0.502875	-0.604441	0.475379	0.154811	0.154811

## Sheet: Table S4
Supplementary Table 4. Annotation of candicate viruses marker associated DEGs in SLE by KEGG and GO terms.
Category	Term	Count	P value*	Genes	Fold Enrichment
KEGG_PATHWAY	hsa01100:Metabolic pathways	40	0.0160687	HGSNAT, ATP5E, GALNT1, POLR2F, SGMS2, CYP51A1, GPAT2, CMBL, AFMID, NDUFS7, MTHFD1, ARG1, CEPT1, B3GNT4, PIK3C3, FUT1, UGT8, GAPDH, LIPT1, ACSL6, MOCS1, DLST, PLA2G16, FAXDC2, ACO1, NADSYN1, NDUFA13, DGKH, DBH, CPS1, LPIN1, POLR2J3, NME7, AK9, RIMKLB, COQ6, PI4K2A, ATP5C1, ATP6V0A2, TPH2	1.41966
KEGG_PATHWAY	hsa04114:Oocyte meiosis	7	0.0420509	PPP1CA, RPS6KA2, ADCY6, IGF1, ANAPC11, SKP1, SMC1B	2.72837
GOTERM_BP_DIRECT	GO:0000375~RNA splicing, via transesterification reactions	5	0.00338551	WDR83, SCAF11, PRPF8, PRPF4, SMNDC1	7.86511
GOTERM_BP_DIRECT	GO:0050900~leukocyte migration	10	0.00391243	F11R, SLC16A1, CD244, ROCK1, PPIA, CEACAM8, SHC1, ITGA3, DBH, ITGAM	3.2234
GOTERM_BP_DIRECT	GO:0032091~negative regulation of protein binding	6	0.0145869	PPP1CA, ROCK1, ADNP, USP33, GOLGA2, LRPAP1	4.13953
GOTERM_BP_DIRECT	GO:0010628~positive regulation of gene expression	14	0.0166762	SRPK2, WNT16, LDLR, VIM, HFE, TLR3, ITGA3, RIMS2, HMGA2, DDX58, RPS6KA2, HINFP, VPS35, NFE2L2	2.10136
GOTERM_BP_DIRECT	GO:0006355~regulation of transcription, DNA-templated	51	0.0289728	ZKSCAN7, HKR1, ZNFX1, YBX3, CDKN2AIPNL, KANK1, HLX, MYB, ZNF493, INO80C, ZNF546, POU2AF1, ZNF506, SNAPC3, ADNP, HMG20B, ZNF793, HMGA2, PRDM7, MYT1L, ZFP82, ZNF439, ZNF135, ZZZ3, ZNF713, ZNF431, LBX2, COMMD4, ZNF276, DPF2, ZNF555, ZNF554, ZNF430, ZNF273, NR3C2, ZNF616, SCAND2P, DMD, HINFP, ZNF473, BAZ2B, MLLT6, APEX1, ZNF527, L3MBTL2, LZTR1, RCAN1, ZNF669, ZNF221, TRIM22, DMTF1	1.33351
GOTERM_BP_DIRECT	GO:0060445~branching involved in salivary gland morphogenesis	3	0.0303518	FGF7, LAMA5, BMP7	10.7251
GOTERM_BP_DIRECT	GO:0007041~lysosomal transport	3	0.0358207	HGSNAT, NEDD4, USE1	9.83138
GOTERM_BP_DIRECT	GO:0075733~intracellular transport of virus	5	0.0400596	NMT2, NUP62, CD209, VPS37B, VPS37C	3.85544
GOTERM_BP_DIRECT	GO:0007519~skeletal muscle tissue development	5	0.0400596	METTL8, DMD, HLX, RCAN1, FOXP1	3.85544
GOTERM_BP_DIRECT	GO:0051437~positive regulation of ubiquitin-protein ligase activity involved in regulation of mitotic cell cycle transition	6	0.0437837	ANAPC16, PSMB4, PSMC5, PSMB6, ANAPC11, SKP1	3.10465
GOTERM_BP_DIRECT	GO:0048705~skeletal system morphogenesis	4	0.0467222	FMN1, ZFAND5, RYK, HHIP	4.91569
GOTERM_BP_DIRECT	GO:0043488~regulation of mRNA stability	7	0.0471873	ZC3H14, PSMB4, EXOSC9, PSMC5, PSMB6, EXOSC7, APEX1	2.67261
GOTERM_MF_DIRECT	GO:0005515~protein binding	250	0.00769846	MOCOS, PNMA2, ADCY6, USE1, DNAJB13, NSRP1, HOOK3, APP, RPLP0, PIK3C3, C7ORF49, RAPGEF6, H2AFY, TIGD7, F11R, TYRO3, MRPL51, ROCK1, EFCAB12, MED11, HMG20B, SKP1, EXD1, BCL2L13, NME7, WDR83, PRDM7, PPP1CA, FAM86C1, LHFPL5, RND1, TRAPPC13, MAPK6, ZZZ3, MRPL48, GPATCH11, HFE, RIMS2, RBFA, DNAAF2, DMD, AHNAK2, WDR59, ZC3H14, ASPSCR1, PLAT, SPPL3, ZC3H18, TAOK1, TMEM120B, TRIO, ATR, RPS6, NCKAP1, NUP62,…	1.1146
GOTERM_MF_DIRECT	GO:0016746~transferase activity, transferring acyl groups	5	0.0169031	ZCCHC4, HGSNAT, DLST, LIPT1, CPT1A	5.02142
GOTERM_MF_DIRECT	GO:0001948~glycoprotein binding	6	0.0248288	PLAT, LDLR, FBXO27, VIM, ITGA3, ITGAM	3.61542
GOTERM_MF_DIRECT	GO:0003676~nucleic acid binding	36	0.0294303	ZNF276, ZKSCAN7, DPF2, ZNF554, RBM34, HKR1, ZNF430, ZNF273, MYEF2, RBM7, ZNF616, DDX27, NPM1, ZNF473, ZCCHC6, RBM28, ZNF493, ZCCHC4, ZNF527, ZNF546, ZNF506, ZNF669, ZNF221, ZNF793, RBMX, DDX58, ZFP82, PRDM7, ZNF439, ZNF135, CELF4, CLIP1, ZNF713, ZNF431, ZNF385C, GPATCH11	1.43149
GOTERM_MF_DIRECT	GO:0043130~ubiquitin binding	6	0.0487539	UBXN11, NUP62, NEDD4, PER2, OTUB2, USP33	3.01285
GOTERM_CC_DIRECT	GO:0015030~Cajal body	6	0.00973164	ZNF473, HINFP, ANGEL2, TRIM22, PRPF4, SMNDC1	4.57143
GOTERM_CC_DIRECT	GO:0005794~Golgi apparatus	33	0.0242867	GALNT1, FGF7, LDLR, AP1G2, SGMS2, IL15, TLR6, SEC14L1, HOOK3, APP, PSMB6, SCRG1, TRIM69, FUT1, TMEM192, USP33, GOLGA2, TMC6, LZTR1, ACO1, CASC4, TMEM132A, ATR, COQ6, LRPAP1, NMT2, FAM198B, NEDD4, TMEM43, PI4K2A, SH3D19, YIPF4, EMP2	1.48585
GOTERM_CC_DIRECT	GO:0005622~intracellular	47	0.0246459	ZKSCAN7, HKR1, ZNF430, ZNF273, ADCY6, TLR3, TRIM52, RIMS2, ZNF616, RUNDC1, STAC2, RASGRP3, TRIM69, RPLP0, PIK3C3, ZNF473, RAPGEF6, SHC1, APEX1, ZNF493, ZNF527, ZNF546, RAB2B, GTPBP1, ABR, ROCK1, DFFA, ZNF506, DFFB, ZNF669, DGKH, RCAN1, ZNF221, ZNF793, TRIM22, DEPDC4, TRNT1, ZFP82, ZNF439, RND1, RAB37, ZNF135, AKAP5, SYTL2, ZNF431, ZNF713, EVI5L	1.37109
GOTERM_CC_DIRECT	GO:0005765~lysosomal membrane	14	0.0252956	SPPL3, HGSNAT, ABCC10, TLR3, TECPR1, CYB561A3, LAMP2, PI4K2A, SLC30A4, SLC30A2, VPS35, TMEM192, ATP6V0A2, PQLC2	1.9854
GOTERM_CC_DIRECT	GO:0005813~centrosome	19	0.0272463	DPF2, C2CD3, IFT80, CEP78, BRCA2, SFI1, SKP1, NME7, HOOK3, BBS1, CCDC77, SLC16A1, FGFR1OP, NPM1, MZT2A, CLIP1, NFE2L2, APEX1, USP33	1.73307
GOTERM_CC_DIRECT	GO:0005730~nucleolus	32	0.0350027	ZNF554, RBM34, POLR2F, PNMA2, CDKN2AIPNL, ANAPC11, DDX27, SCAF11, DGCR8, TRIM69, BRIX1, NPM1, PER2, HINFP, H2AFY, BCL9L, RBM28, APEX1, INO80C, ZC3H14, SRPK2, EXOSC9, EXOSC7, ZNF506, RRP15, DFFB, CPS1, RPS6, CD3EAP, BRWD1, PPP1CA, ZZZ3	1.45091
GOTERM_CC_DIRECT	GO:0016607~nuclear speck	11	0.0352138	ZC3H14, CD2BP2, TRIM69, PRPF8, NSRP1, APEX1, TRIM22, PRPF4, NUGGC, SMNDC1, THOC1	2.12651
GOTERM_CC_DIRECT	GO:0005770~late endosome	8	0.0380065	LAMP2, LDLR, PIK3C3, SLC30A4, SLC30A2, VPS35, TMEM192, SLC31A1	2.54801
GOTERM_CC_DIRECT	GO:0000177~cytoplasmic exosome (RNase complex)	3	0.0425731	GTPBP1, EXOSC9, EXOSC7	8.96703
* Statistical significance of the difference.
The top enriched GO and pathway analysis enriched in the candicate virus marker interactome are listed.

## Sheet: Table S5
Supplementary Table 5. Most relevant biological networks using Analyze Networks (AN) algorithm with default settings.
No	Network name	Processes	Size	Target	Pathways	p‑Value	zScore	gScore
1	WNT, IGF‑1, Beta‑catenin, TCF7L2 (TCF4), GSK3 beta	regulation of cell proliferation (85.7%), canonical Wnt signaling pathway (42.9%), gland development (61.2%), cell surface receptor signaling pathway (87.8%), regulation of signal transduction (93.9%)	52	3	622	7.06e‑06	15.61	793.11
2	TM2D1, SEZ6, TMEM192, C6orf201, WNT16	muscle contraction (34.1%), muscle system process (34.1%), striated muscle contraction (20.5%), actin‑mediated cell contraction (18.2%), cardiac muscle contraction (18.2%)	50	14	0	2.96e‑33	75.04	75.04
3	PAQR7, NAG‑2, GP‑1, RNF36, ECHDC2	serotonin receptor signaling pathway (20.0%), G protein‑coupled serotonin receptor signaling pathway (18.0%), protein localization to organelle (40.0%), SRP‑dependent cotranslational protein targeting to membrane (20.0%), cotranslational protein targeting to membrane (20.0%)	50	12	0	9.43e‑28	64.3	64.3
